# Supplementary material
Source: PubMed Central journal article supplement (PMC9903931)
Supplement: mmc1.pdf [file mmc1.pdf]

**Supplemental text for:**

**Model-based assessment of COVID-19 transmission dynamics within partially vaccinated school populations during an in-person fall 2021 semester**

Jennifer R. Head<sup>a</sup>, Kristin L. Andrejko<sup>a</sup>, Justin V. Remais<sup>b\*</sup>

<sup>a</sup> Division of Epidemiology, School of Public Health, University of California, Berkeley, Berkeley, CA, USA

<sup>b</sup> Division of Environmental Health Sciences, School of Public Health, University of California, Berkeley, Berkeley, CA, USA

\* Corresponding author: Justin V. Remais, PhD

**Email:** [jvr@berkeley.edu](mailto:jvr@berkeley.edu)

**ORCID:** [0000-0002-0223-4615](https://orcid.org/0000-0002-0223-4615)

**Keywords**

COVID-19, SARS-CoV-2, schools, vaccine coverage, masks, transmission model

Data and code for this analysis can be found at <https://github.com/jrhead/COVIDandVaccinatedSchools>

## Contents

|                                                                                                                                                                                                                                                                                                            |    |
|------------------------------------------------------------------------------------------------------------------------------------------------------------------------------------------------------------------------------------------------------------------------------------------------------------|----|
| <b>Table S1.</b> Parameters of the susceptible-exposed-infected-recovered model .....                                                                                                                                                                                                                      | 4  |
| Transmission model details.....                                                                                                                                                                                                                                                                            | 5  |
| Description of reopening strategies.....                                                                                                                                                                                                                                                                   | 7  |
| Supplemental results for modelling scenarios from the main text .....                                                                                                                                                                                                                                      | 8  |
| <b>Table S2.</b> The number of excess student cases attributable to school transmission expected across a four-month semester, for 50% community vaccination coverage.. .....                                                                                                                              | 8  |
| <b>Table S3.</b> The number of excess student cases attributable to school transmission expected across a four-month semester, for 60% community vaccination coverage. ....                                                                                                                                | 8  |
| <b>Table S4.</b> The minimum non-pharmaceutical intervention needed to reduce the risk of symptomatic infection to beneath a given threshold assuming that 50% of the vaccine-eligible community has received a vaccine. ....                                                                              | 9  |
| <b>Table S5.</b> The minimum non-pharmaceutical intervention to reduce the risk of symptomatic infection to beneath a given threshold assuming that 60% of the vaccine-eligible community has received a vaccine. ....                                                                                     | 9  |
| <b>Figure S1.</b> Effect of non-pharmaceutical interventions and vaccine coverages >70%.....                                                                                                                                                                                                               | 10 |
| <b>Table S6.</b> Excess <i>symptomatic</i> infections attributable to school transmission by population subgroup and scenario examined.....                                                                                                                                                                | 11 |
| <b>Table S7.</b> Excess infections (including asymptomatic infection) attributable to school transmission by population subgroup and scenario examined.....                                                                                                                                                | 14 |
| <b>Table S8.</b> Excess hospitalizations attributable to school transmission by population subgroup and scenario examined.....                                                                                                                                                                             | 17 |
| <b>Table S9.</b> Excess infections (all, symptomatic, and severe) among household members of students and general community members, stratified by vaccination coverage and within-school intervention.....                                                                                                | 19 |
| Supplemental results assuming lower infectiousness of asymptomatic individuals .....                                                                                                                                                                                                                       | 20 |
| <b>Table S10.</b> The minimum non-pharmaceutical intervention to reduce the risk of symptomatic infection to beneath a given threshold, assuming that 70% of the vaccine-eligible community has received a vaccine and the relative infectiousness of asymptomatic individuals ( $\alpha$ ) is 0.3.. ..... | 20 |
| <b>Table S11.</b> Excess <i>symptomatic</i> infections attributable to school transmission by population subgroup and scenario examined, using $\alpha = 0.3$ .....                                                                                                                                        | 21 |
| <b>Table S12.</b> Excess infections (including asymptomatic infection) attributable to school transmission by population subgroup and scenario examined, using $\alpha = 0.3$ . ....                                                                                                                       | 24 |
| <b>Table S13.</b> Excess hospitalizations attributable to school transmission, using $\alpha = 0.3$ .....                                                                                                                                                                                                  | 27 |
| <b>Figure S2.</b> Effect of non-pharmaceutical interventions under lower infectiousness of asymptomatic carriers ( $\alpha= 0.3$ ).....                                                                                                                                                                    | 29 |
| Supplemental results for Alpha variant.....                                                                                                                                                                                                                                                                | 30 |
| <b>Table S14.</b> Excess symptomatic infections attributable to school transmission assuming circulation of the Alpha variant only, stratified by levels of community vaccination coverage and within-school non-pharmaceutical interventions. ....                                                        | 30 |

**Figure S3.** Effect of masks across three levels of community vaccination coverage (50%, 60%, 70%), assuming circulation of the Alpha variant only. .... 31

**Table S15.** The minimum non-pharmaceutical intervention(s), or minimum within-school vaccination coverage of the eligible population, needed to reduce the risk of symptomatic infection to beneath a given threshold, assuming that 70% of the vaccine-eligible community has received a vaccine and circulation of the Alpha variant alone..... 32

References..... 33

**Table S1.** Parameters of the susceptible-exposed-infected-recovered model

| Parameter                                                                                                   | Ages (i)                                                                                                                                                            | Values                                                                                 | References                                                                        |
|-------------------------------------------------------------------------------------------------------------|---------------------------------------------------------------------------------------------------------------------------------------------------------------------|----------------------------------------------------------------------------------------|-----------------------------------------------------------------------------------|
| Basic reproduction number, $R_0$                                                                            | all                                                                                                                                                                 | 5.0 – Delta variant<br>2.5 – Alpha variant                                             | CDC [1]                                                                           |
| Proportion of infections attributable to Delta variant                                                      | all                                                                                                                                                                 | 84%                                                                                    | CDPH [2]                                                                          |
| Average incubation period, $d_L$ (95% CI)                                                                   | all                                                                                                                                                                 | 5.4 (2.4, 8.3)                                                                         | Guan, et al[3]<br>Li, et al[4]<br>Lauer, et al[5]                                 |
| Average duration of infection, non-hospitalized individuals, $d_I$ (95% CI)                                 | all                                                                                                                                                                 | 7.5 (4.7, 9.6)                                                                         | Ma, et al [6]<br>Byrne, et al [7]                                                 |
| Average time from infection to hospitalization, $d_H$ (95% CI)                                              | all                                                                                                                                                                 | 7.2 (4.6, 9.4)                                                                         | Li, et al [8]<br>Moghadas, et al [9]<br>Arentz, et al [10]<br>Shoukat, et al [11] |
| Average duration of hospitalization, individuals who recover, $d_R$ , or die, $d_M$ (95% CI)                | all                                                                                                                                                                 | 14.4 (11.3, 16.6)                                                                      | Lewnard, et al[12]<br>Ferguson, et al[13]                                         |
| Probability case is clinical,<br>$\Pr(\text{symptoms} \mid \text{age, infection})$                          | $i < 20$<br>$i \geq 20$                                                                                                                                             | 0.21<br>0.69                                                                           | Davies, et al[14]<br>Garcia, et al [15]                                           |
| Probability infection is acquired from subclinical transmission, $\alpha$                                   | all                                                                                                                                                                 | 0.50                                                                                   | Byambasuren, et al [16]                                                           |
| Probability of hospitalization among clinical cases,<br>$\Pr(\text{hospital} \mid \text{age, symptoms})$    | $i < 10$<br>$10 \leq i < 20$<br>$20 \leq i < 30$<br>$30 \leq i < 40$<br>$40 \leq i < 50$<br>$50 \leq i < 60$<br>$60 \leq i < 70$<br>$70 \leq i < 80$<br>$i \geq 80$ | 0.00001<br>0.000408<br>0.0104<br>0.0343<br>0.0425<br>0.0816<br>0.118<br>0.166<br>0.184 | Verity, et al[17]                                                                 |
| Probability of death among hospitalized patients,<br>$\Pr(\text{death} \mid \text{age, hospital})$          | $i < 20$<br>$20 \leq i < 30$<br>$30 \leq i < 40$<br>$40 \leq i < 50$<br>$50 \leq i < 60$<br>$60 \leq i < 70$<br>$70 \leq i < 80$<br>$i \geq 80$                     | 0.02<br>0.031<br>0.0475<br>0.0785<br>0.1215<br>0.186<br>0.301<br>0.4515                | Lewnard, et al[12]                                                                |
| Ratio of susceptibility among adults to susceptibility among children, $\beta_{i < 10} / \beta_{i \geq 10}$ | all                                                                                                                                                                 | 0.50                                                                                   | Viner, et al[18]                                                                  |
| Vaccination coverage                                                                                        | $i \geq 12$                                                                                                                                                         | 50 – 95%                                                                               | CDC Data Tracker [19]                                                             |
| Vaccine effectiveness against:                                                                              |                                                                                                                                                                     |                                                                                        |                                                                                   |
| - any infection                                                                                             | $i \geq 12$                                                                                                                                                         | 77%                                                                                    | Higdon, et al [20]                                                                |
| - symptomatic infection                                                                                     | $i \geq 12$                                                                                                                                                         | 85%                                                                                    | Bernal, et al [21]                                                                |
| - severe infection (requiring hospitalization)                                                              | $i \geq 12$                                                                                                                                                         | 93%                                                                                    | Self, et al [22]                                                                  |

## Transmission model details

We developed a discrete-time, age-structured individual-based stochastic model to simulate COVID-19 transmission dynamics in the synthetic population (Figure 1A). At each point in time, representative of one day, each individual is associated with an epidemiological state: vaccinated (V), susceptible (S), exposed (E), asymptomatic (A), symptomatic with non-severe illness (C), symptomatic with severe illness (H1, D1) resulting in eventual hospitalization before recovery (H2) or hospitalization before death (D2), recovered (R), or dead (M). Model parameters are in Table S1.

The daily contact rate between individuals  $i$  and  $j$  on day  $t$ ,  $K_{ij,t}$ , was estimated for pairs of individuals,

$$K_{ij,t} = \begin{cases} 1 & \text{for household interaction} \\ 5/7 \cdot \rho_{sch}(x_i, x_j, t) \cdot \rho_{int}(x_i, x_j, t) & \text{for class interaction} \\ 1/7 \cdot \rho_{sch}(x_i, x_j, t) \cdot \rho_{int}(x_i, x_j, t) & \text{for grade interaction} \\ 1/35 \cdot \rho_{sch}(x_i, x_j, t) \cdot \rho_{int}(x_i, x_j, t) & \text{for school interaction} \\ 5/7 \cdot \rho_{wrk}(x_i, x_j, t) \cdot \rho_{int}(x_i, x_j, t) & \text{for workplace interaction} \\ K(\text{age}_i, \text{age}_j)/N(\text{age}_j) \cdot \rho_{com}(x_i, x_j, t) & \text{for community interaction} \end{cases}$$

where the scaling ratios between classes, grades, and schools were obtained from previous study on transmission in various settings.[23] Community interaction represents the number of contacts expected between individuals from age groups of individuals  $i$  and  $j$  scaled by the number of individuals in the age group of individual  $j$ .  $\rho_{int}(x_i, x_j, t)$  is a factor between 0 and 1 representing a social distancing intervention to reduce contact between individual pairs, and is equal to one under a no-intervention scenario. Because symptomatic individuals mix less with the community[24], we simulated a 100% reduction in daily school or work contacts and a 75% reduction in community contacts for a proportion (48%) of symptomatic individuals, and an additional proportion (50%) of their household members.[25] For these individuals,  $\rho_{sch}(x_i, x_j, t)$  and  $\rho_{wrk}(x_i, x_j, t)$  is equal to 0 and  $\rho_{com}(x_i, x_j, t)$  is equal to 0.25, if: 1) either individual  $i$  or  $j$  is symptomatic (C, H1, or D1) on day  $t$  and isolates with some probability, or 2) either individual  $i$  or  $j$  is a household member of a symptomatic individual on day  $t$  and quarantines with some probability; and otherwise equal to 1. We assumed that individuals were in the infectious class for up to 3 days prior to observing symptoms[26], during which time they did not reduce their daily contacts.

Transmission was implemented probabilistically for contacts between susceptible (S) and infectious individuals in the asymptomatic (A) or symptomatic and non-hospitalized states (C, H1, D1). Movement of individual  $i$  on day  $t$  from the susceptible to the exposed class is determined by a Bernoulli random draw with probability of infection per day given by the daily force of infection,  $\lambda_{i,t}$ :

$$\lambda_{i \in S, t} = \alpha \beta_i \sum_{j=1}^N K_{ij,t} A_{j,t} + \beta_i \sum_{j=1}^N K_{ij,t} (C_{j,t} + H1_{j,t} + D1_{j,t}) \quad (1)$$

Movement of an individual  $i$  on day  $t$  from the vaccinated to the exposed class was determined by a Bernoulli random draw with probability of infection per day given by the daily force of infection,  $\lambda_{i,t}$ , reduced by the vaccine effectiveness against any infection:

$$\lambda_{i \in V, t} = (1 - VE_{any\ infection}) \lambda_{i \in S, t} \quad (2)$$

In equations (1) and (2),  $\alpha$  is the ratio of the force of infection between asymptomatic and symptomatic individuals; and  $\beta_i$  is calculated from  $\bar{\beta}$ , the population mean transmission rate of the pathogen.  $\bar{\beta}$  is determined using the next-generation matrix method[27] as:

$$\bar{\beta} = \frac{R_0}{[d_I(p_C + \alpha p_A) + d_H(p_H + p_D)] \bar{K}} \quad (3)$$

where  $R_0$  is the basic reproduction number (defined as the expected number of secondary cases from a single infected case in a completely susceptible population);  $p_s$  is the proportion of agents destined for state  $s$ ;  $d_I$  is the average time between infection and recovery for tracks A and C;  $d_H$  is the average time between infection and hospitalization for tracks H and D; and  $\bar{K}$  is the mean number of contacts an individual makes daily under no interventions, weighted by their probability of being contacted.[28] Here, we calculated  $R_0$  as 4.6, based on an average of  $R_0$  for the Alpha ( $R_0 = 2.5$  and proportion = 16%) and Delta variant ( $R_0 = 5.0$  and proportion = 84%), weighted by the proportion of circulating variants in summer 2021 [1, 2]. We represent age-varying susceptibility[14] using an age-stratified  $\beta_i$  that incorporates the ratio of the susceptibility of adults to children and jointly solves equations (4) and (5):

$$\bar{\beta} = \beta_{i \geq age} \frac{n_{i \geq age}}{N} + \beta_{i < age} \frac{n_{i < age}}{N} \quad (4)$$

$$\beta_{i \geq age} = \beta_{i < age} \left( \frac{\text{Susceptibility of adults}}{\text{Susceptibility of children}} \right) \quad (5)$$

The duration of the latent period,  $d_L$ , for each individual transitioning from class E was drawn from a Weibull distribution with mean 5.4 days (95% CI: 2.4, 8.3).[3-5] Whether an individual remained asymptomatic, or was hospitalized, or died was determined via Bernoulli random draws from age-stratified conditional probabilities (Figure 1B, Table S5). The time to recovery for non-hospitalized cases (mean: 13.1 days, 95% CI: 8.3, 16.9)[29], the time to hospitalization for severe cases (mean: 10.3, 95% CI: 6.5, 13.3)[30], and time to recovery or death for hospitalized cases (mean: 14.4, 95% CI: 11.3, 16.6) were sampled from Weibull distributions (Table S5) [12].

The disease progression track followed by each individual after movement to the exposed state was assigned from Bernoulli random draws at the start of each simulation. Tracks for unvaccinated individuals were sampled from distributions specified by the age-stratified conditional probabilities, given in Table S1. Tracks for vaccinated individuals were sampled from distributions specified by the age-stratified conditional probabilities given, accounting for differential vaccine effectiveness against symptomatic and severe disease. The probability of death is conditional on hospitalization, so conditioning the probability of hospitalization on vaccination status also conditions the probability of death on vaccination status. Specifically, the probability of success for symptomatic and severe (e.g., requiring hospitalization) disease was updated as follows:

$$P(\text{symptoms} | \text{age}, \text{infection}, \text{vaccination}) = P(\text{symptoms} | \text{age}, \text{infection}) * \frac{(1 - VE_{\text{symptomatic}})}{(1 - VE_{\text{any infection}})} \quad (6)$$

$$P(\text{hospital} | \text{age}, \text{symptoms}, \text{vaccination}) = P(\text{hospital} | \text{age}, \text{symptoms}) * \frac{(1 - VE_{\text{severe}})}{(1 - VE_{\text{symptomatic}})} \quad (7)$$

## Description of reopening strategies

### 1. Schools open without precautions

In this scenario, schools are open under a business-as-usual scenario. For all interactions,  $\rho_{int}(x_i, x_j, t) = 1$ . The average class size is 20 students, the average sizes of elementary (K - 5), middle (6-8), and high schools (9-12) are 380, 420, and 620 students.

### 2. Students and faculty wear masks

In this scenario, we assume that both students and teachers wear masks while at school. We assume that the masks both reduce the likelihood of acquiring COVID-19, as well as the likelihood of transmitting it. We assume that the effectiveness of masks for elementary school children is 15%, the effectiveness for middle school children is 25%, the effectiveness for high school children is 35% and the effectiveness for teachers is 50%. Accordingly, for each school, grade, or class pair, we have:

$$\rho_{int}(x_i, x_j, t) = (1 - \eta(x_i)) \cdot (1 - \eta(x_j)),$$

where  $\eta(x_i)$  represents the effectiveness of the mask for individual  $i$ . such that  $\eta(x_i) = 0.15$  if the individual is an elementary school student,  $\eta(x_i) = 0.25$  if the individual is a middle school student,  $\eta(x_i) = 0.35$  if the individual is a high school student, and  $\eta(x_i) = 0.5$  if the individual is a teacher or staff member.

### 3. Stable cohorts: classroom groups are enforced, reducing other grade and school contacts by 75%

In this scenario, we assume that students reduce their contacts with other teachers and students outside of their class group (or cohort) by a given proportion. We model both reductions of outside-class contacts by 50% (“weak” cohort approach) or 75% (“strong” cohort approach). The size of the class group is 20 students, on average. This may be equivalent to reductions in lunchroom or recess contacts, while still permitting chance interactions in the hallways or bathrooms. Here, we update  $\rho_{int}(x_i, x_j, t)$  such that:

$$\rho_{int}(x_i, x_j, t) = \begin{cases} 1 & \text{for class interaction} \\ 0.25 & \text{for grade interaction} \\ 0.25 & \text{for school interaction} \end{cases}$$

### 4. Weekly testing of teachers and students (periodic test-trace-isolate, TTI): Faculty and students are tested with 85% sensitivity on a weekly or monthly basis<sup>42</sup>, and positive cases are isolated and their class quarantined for 14 days

In this scenario, every 7 or 30 days, the state of the non-hospitalized agents are ascertained through a simulated test. We assumed that the test would detect individuals in a symptomatic or asymptomatic or pre-symptomatic state with 85% sensitivity and 100% specificity. If a truly positive case was simulated to test positive, the case would reduce their school contacts by 100% for 14 days and their community contacts by 75% for 14 days. Additionally, the students or teacher in the same class as the case would reduce their school contacts by 100% and their community contacts by 75% for 14 days. This is implemented though updating  $\rho_{sch}(x_i, x_j, t)$  and  $\rho_{comm}(x_i, x_j, t)$  as described. If a school administrator tested positive, only the administrator isolated for 14 days.

## Supplemental results for modelling scenarios from the main text

**Table S2.** The number of excess student cases attributable to school transmission expected across a four-month semester, for 50% community vaccination coverage. Other modelling parameters are given in Table S1.

|                 | Excess student cases attributable to within-school transmission within: |                                                                          |                                  |                                |
|-----------------|-------------------------------------------------------------------------|--------------------------------------------------------------------------|----------------------------------|--------------------------------|
|                 | 380-person<br><b>elementary schools</b><br><i>(half susceptibility)</i> | 380-person<br><b>elementary schools</b><br><i>(equal susceptibility)</i> | 420-person <b>middle schools</b> | 620-person <b>high schools</b> |
| No precautions  | 45 cases per school                                                     | 59 cases per school                                                      | 55 cases per school              | 81 cases per school            |
| Masks           | 22 cases per school                                                     | 44 cases per school                                                      | 31 cases per school              | 35 cases per school            |
| Masks + testing | 15 cases per school                                                     | 38 cases per school                                                      | 24 cases per school              | 24 cases per school            |
| Masks + cohorts | 4 cases per school                                                      | 15 cases per school                                                      | 6 cases per school               | 6 cases per school             |

**Table S3.** The number of excess student cases attributable to school transmission expected across a four-month semester, for 60% community vaccination coverage. Other modelling parameters are given in Table S1.

|                 | Excess student cases attributable to within-school transmission within: |                                                                          |                                  |                                |
|-----------------|-------------------------------------------------------------------------|--------------------------------------------------------------------------|----------------------------------|--------------------------------|
|                 | 380-person<br><b>elementary schools</b><br><i>(half susceptibility)</i> | 380-person<br><b>elementary schools</b><br><i>(equal susceptibility)</i> | 420-person <b>middle schools</b> | 620-person <b>high schools</b> |
| No precautions  | 40 cases per school                                                     | 56 cases per school                                                      | 49 cases per school              | 70 cases per school            |
| Masks           | 17 cases per school                                                     | 40 cases per school                                                      | 24 cases per school              | 21 cases per school            |
| Masks + testing | 10 cases per school                                                     | 33 cases per school                                                      | 16 cases per school              | 13 cases per school            |
| Masks + cohorts | 3 cases per school                                                      | 12 cases per school                                                      | 4 cases per school               | 3 cases per school             |



**Table S4.** The minimum non-pharmaceutical intervention needed to reduce the risk of symptomatic infection to beneath a given threshold (e.g., 50 cases per 1,000 population), assuming that 50% of the vaccine-eligible community has received a vaccine. Other modelling parameters are given in Table S1. ‘Not observed’ indicates that no combination of interventions examined in this study reduced excess risk beneath the indicated threshold.

|          |                                                 | Threshold - symptomatic cases per 1,000 population |                 |                 | < 2 cases per school* |
|----------|-------------------------------------------------|----------------------------------------------------|-----------------|-----------------|-----------------------|
|          |                                                 | <50                                                | <25             | <10             |                       |
| Students | Elementary school – <i>half susceptibility</i>  | Masks + testing                                    | Masks + cohorts | Not observed**  | Not observed**        |
|          | Elementary school – <i>equal susceptibility</i> | Masks + cohorts                                    | Not observed**  | Not observed**  | Not observed**        |
|          | Middle school                                   | Masks + cohorts                                    | Masks + cohorts | Not observed**  | Not observed**        |
|          | High school                                     | Masks + testing                                    | Masks + cohorts | Masks + cohorts | Not observed**        |
| Teachers | Elementary school – <i>half susceptibility</i>  | Masks + testing                                    | Masks + cohorts | Not observed**  |                       |
|          | Elementary school – <i>equal susceptibility</i> | Masks + cohorts                                    | Not observed**  | Not observed**  |                       |
|          | Middle school                                   | Masks + cohorts                                    | Masks + cohorts | Not observed**  |                       |
|          | High school                                     | Masks + testing                                    | Masks + cohorts | Masks + cohorts |                       |

\*Assuming a 380-person elementary school, 420-person middle school, and 680-person high school

\*\*not observed under the specific combination of interventions simulated

**Table S5.** The minimum non-pharmaceutical intervention to reduce the risk of symptomatic infection to beneath a given threshold (e.g., 50 cases per 1,000 population), assuming that 60% of the vaccine-eligible community has received a vaccine. Other modelling parameters are given in Table S1. ‘Not observed’ indicates that no combination of interventions examined in this study reduced excess risk beneath the indicated threshold.

|          |                                                 | Threshold - symptomatic cases per 1,000 population |                 |                 | < 2 cases per school* |
|----------|-------------------------------------------------|----------------------------------------------------|-----------------|-----------------|-----------------------|
|          |                                                 | <50                                                | <25             | <10             |                       |
| Students | Elementary school – <i>half susceptibility</i>  | Masks                                              | Masks + cohorts | Masks + cohorts | Not observed**        |
|          | Elementary school – <i>equal susceptibility</i> | Masks + cohorts                                    | Not observed**  | Not observed**  | Not observed**        |
|          | Middle school                                   | Masks + testing                                    | Masks + cohorts | Masks + cohorts | Not observed**        |
|          | High school                                     | Masks                                              | Masks + testing | Masks + cohorts | Not observed**        |
| Teachers | Elementary school – <i>half susceptibility</i>  | Masks                                              | Masks + cohorts | Masks + cohorts |                       |
|          | Elementary school – <i>equal susceptibility</i> | Masks + cohorts                                    | Masks + cohorts | Not observed**  |                       |
|          | Middle school                                   | Masks                                              | Masks + cohorts | Masks + cohorts |                       |
|          | High school                                     | Masks                                              | Masks + testing | Masks + cohorts |                       |

\*Assuming a 380-person elementary school, 420-person middle school, and 680-person high school

\*\*not observed under the specific combination of interventions simulated

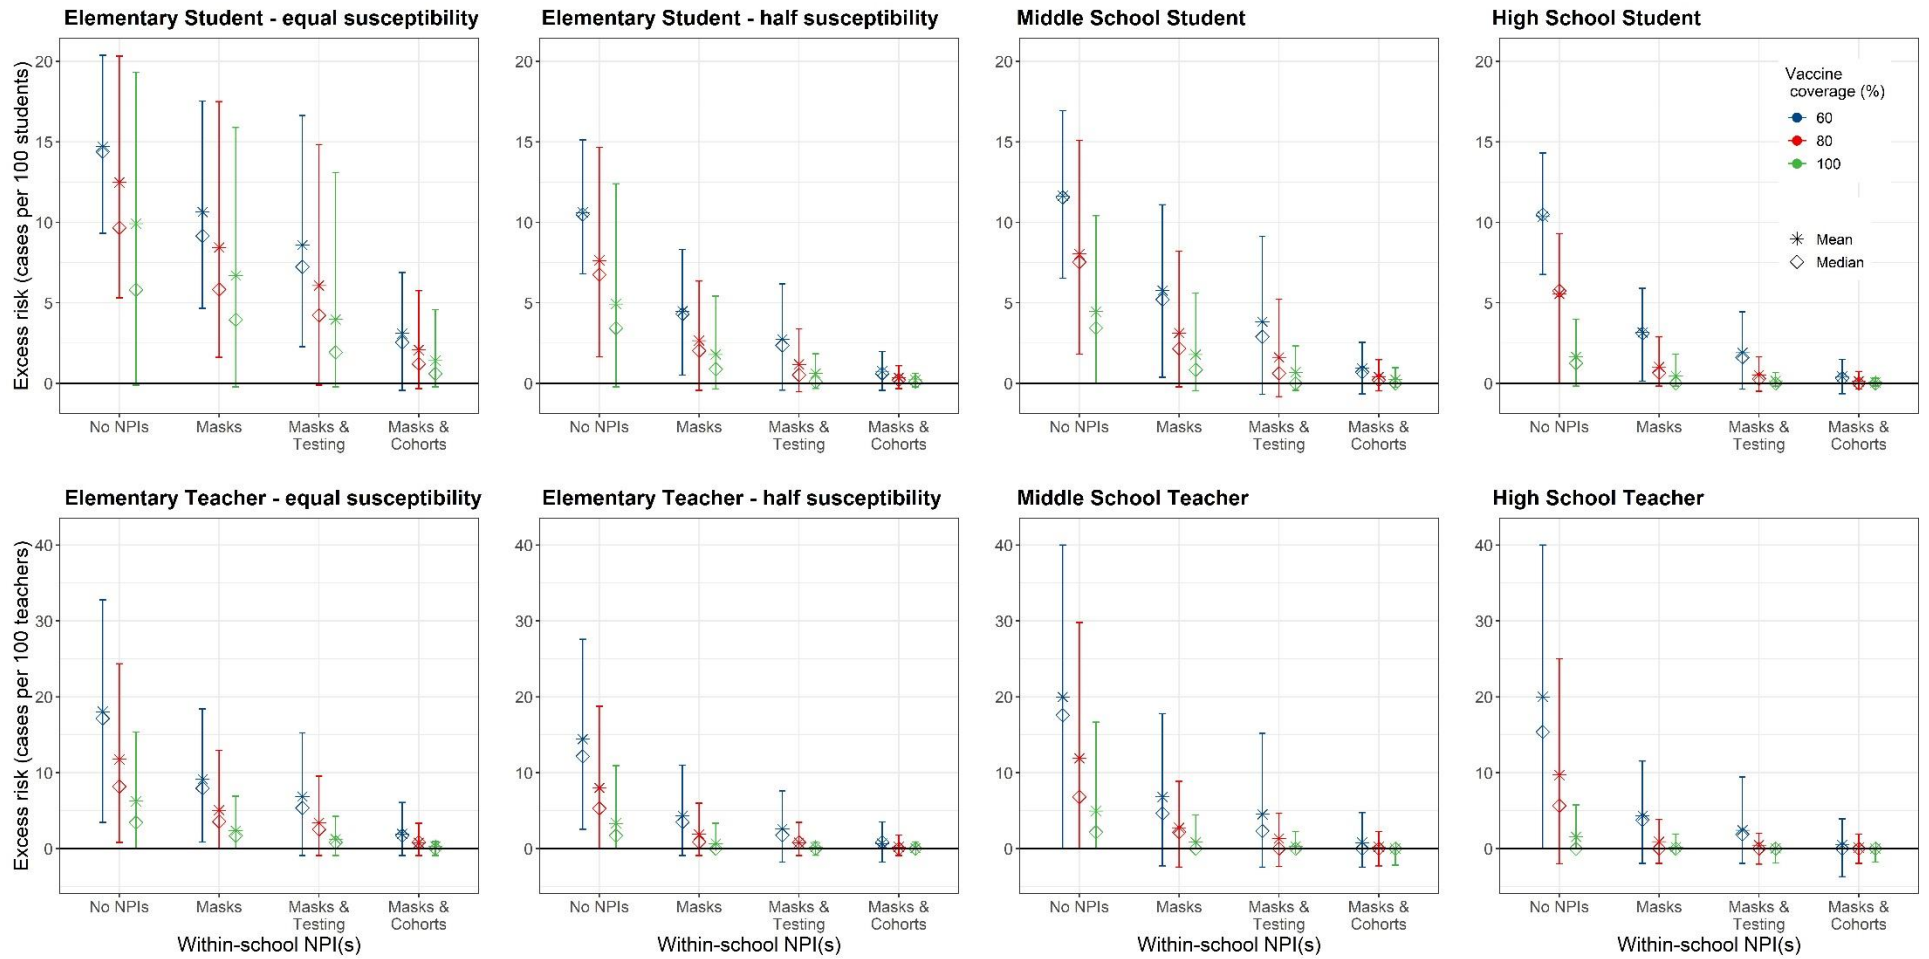

**Figure S1. Effect of non-pharmaceutical interventions and vaccine coverages >70%.** We examined the effect of three non-pharmaceutical interventions across three levels of community vaccination coverage (50%, 60%, 70%), assuming that vaccination coverage within school children 12+ and teachers matches that in the community and the vaccine effectiveness is 77% against infection, 85% against symptomatic infection, and 93% against severe infection. Masks indicate universal masks regardless of vaccination status. We calculated the mean (stars) and median (diamonds) of excess cases per 100 persons attributable to school transmission among population subgroups across 1,000 model realizations. Vertical lines reflect the 89<sup>th</sup> percentile high probability density interval (HPDI).

**Table S6.** Excess *symptomatic* infections attributable to school transmission by population subgroup and scenario examined. Modelling parameters are given in Table S1.

| Vaccine coverage (%) | NPI             | Susceptibility of children <10 years | Population            | Mean (89% HPDI) excess infections per 100 population | Median excess infections per 100 population | Infections per school* |
|----------------------|-----------------|--------------------------------------|-----------------------|------------------------------------------------------|---------------------------------------------|------------------------|
| 50                   | None            | Equal                                | Elementary student    | 15.5 (10.8, 20.3)                                    | 15.7                                        | 59                     |
| 50                   | None            | Half                                 | Elementary student    | 11.9 (9, 15.6)                                       | 12                                          | 45                     |
| 50                   | None            |                                      | Middle school student | 13.1 (8.8, 17.9)                                     | 13.2                                        | 55                     |
| 50                   | None            |                                      | High school student   | 12 (8.6, 15.7)                                       | 12                                          | 81                     |
| 50                   | None            | Equal                                | Elementary teacher    | 21.4 (6, 37.8)                                       | 20.4                                        |                        |
| 50                   | None            | Half                                 | Elementary teacher    | 18.1 (4.2, 31.9)                                     | 17                                          |                        |
| 50                   | None            |                                      | Middle school teacher | 23.3 (2.2, 44.2)                                     | 22                                          |                        |
| 50                   | None            |                                      | High school teacher   | 24.1 (3.5, 47.3)                                     | 21.6                                        |                        |
| 50                   | Masks           | Equal                                | Elementary student    | 11.7 (5.9, 17.7)                                     | 11.2                                        | 44                     |
| 50                   | Masks           | Half                                 | Elementary student    | 5.7 (1.8, 9.4)                                       | 5.8                                         | 22                     |
| 50                   | Masks           |                                      | Middle school student | 7.5 (1.8, 13.3)                                      | 7.1                                         | 31                     |
| 50                   | Masks           |                                      | High school student   | 5.1 (1.3, 8.6)                                       | 5.1                                         | 35                     |
| 50                   | Masks           | Equal                                | Elementary teacher    | 11.8 (1.7, 22.2)                                     | 10.7                                        |                        |
| 50                   | Masks           | Half                                 | Elementary teacher    | 6.4 (-0.9, 13.8)                                     | 6                                           |                        |
| 50                   | Masks           |                                      | Middle school teacher | 10 (-2.3, 23.4)                                      | 8.7                                         |                        |
| 50                   | Masks           |                                      | High school teacher   | 7.6 (-2, 18.2)                                       | 6.6                                         |                        |
| 50                   | Masks + Testing | Equal                                | Elementary student    | 10 (4.2, 16.8)                                       | 9.2                                         | 38                     |
| 50                   | Masks + Testing | Half                                 | Elementary student    | 3.9 (0.2, 7.1)                                       | 3.9                                         | 15                     |
| 50                   | Masks + Testing |                                      | Middle school student | 5.7 (0, 10.8)                                        | 5.1                                         | 24                     |
| 50                   | Masks + Testing |                                      | High school student   | 3.5 (0, 6.6)                                         | 3.4                                         | 24                     |
| 50                   | Masks + Testing | Equal                                | Elementary teacher    | 9.4 (0, 19.3)                                        | 8.5                                         |                        |
| 50                   | Masks + Testing | Half                                 | Elementary teacher    | 4.3 (-2.7, 10.3)                                     | 3.5                                         |                        |
| 50                   | Masks + Testing |                                      | Middle school teacher | 7.3 (-2.4, 20)                                       | 6.5                                         |                        |
| 50                   | Masks + Testing |                                      | High school teacher   | 5.2 (-2, 15.1)                                       | 3.8                                         |                        |
| 50                   | Masks + Cohorts | Equal                                | Elementary student    | 4 (0, 8.3)                                           | 3.5                                         | 15                     |
| 50                   | Masks + Cohorts | Half                                 | Elementary student    | 1.1 (-0.3, 2.7)                                      | 1.1                                         | 4                      |
| 50                   | Masks + Cohorts |                                      | Middle school student | 1.5 (-0.7, 3.8)                                      | 1.3                                         | 6                      |
| 50                   | Masks + Cohorts |                                      | High school student   | 0.8 (-0.5, 2.5)                                      | 0.7                                         | 6                      |
| 50                   | Masks + Cohorts | Equal                                | Elementary teacher    | 2.9 (-1.8, 7.6)                                      | 2.6                                         |                        |
| 50                   | Masks + Cohorts | Half                                 | Elementary teacher    | 1 (-2.7, 4.4)                                        | 0.9                                         |                        |
| 50                   | Masks + Cohorts |                                      | Middle school teacher | 1.4 (-4.7, 6.8)                                      | 2.1                                         |                        |
| 50                   | Masks + Cohorts |                                      | High school teacher   | 1 (-4, 5.8)                                          | 0.9                                         |                        |
| 60                   | None            | Equal                                | Elementary student    | 14.7 (9.3, 20.4)                                     | 14.4                                        | 56                     |
| 60                   | None            | Half                                 | Elementary student    | 10.6 (6.8, 15.1)                                     | 10.5                                        | 40                     |
| 60                   | None            |                                      | Middle school student | 11.7 (6.5, 16.9)                                     | 11.6                                        | 49                     |
| 60                   | None            |                                      | High school student   | 10.4 (6.8, 14.3)                                     | 10.5                                        | 70                     |
| 60                   | None            | Equal                                | Elementary teacher    | 18 (3.4, 32.8)                                       | 17.2                                        |                        |
| 60                   | None            | Half                                 | Elementary teacher    | 14.4 (2.6, 27.6)                                     | 12.2                                        |                        |
| 60                   | None            |                                      | Middle school teacher | 20 (0, 40)                                           | 17.6                                        |                        |
| 60                   | None            |                                      | High school teacher   | 20 (0, 40)                                           | 15.4                                        |                        |
| 60                   | Masks           | Equal                                | Elementary student    | 10.6 (4.7, 17.5)                                     | 9.2                                         | 40                     |
| 60                   | Masks           | Half                                 | Elementary student    | 4.5 (0.5, 8.3)                                       | 4.3                                         | 17                     |

|    |                 |       |                       |                  |      |    |
|----|-----------------|-------|-----------------------|------------------|------|----|
| 60 | Masks           |       | Middle school student | 5.8 (0.4, 11.1)  | 5.2  | 24 |
| 60 | Masks           |       | High school student   | 3.2 (0.1, 5.9)   | 3.1  | 21 |
| 60 | Masks           | Equal | Elementary teacher    | 9.2 (0.9, 18.4)  | 8    |    |
| 60 | Masks           | Half  | Elementary teacher    | 4.3 (-0.9, 11)   | 3.5  |    |
| 60 | Masks           |       | Middle school teacher | 6.8 (-2.3, 17.8) | 4.7  |    |
| 60 | Masks           |       | High school teacher   | 4.3 (-2, 11.5)   | 3.8  |    |
| 60 | Masks + Testing | Equal | Elementary student    | 8.6 (2.3, 16.6)  | 7.2  | 33 |
| 60 | Masks + Testing | Half  | Elementary student    | 2.8 (-0.4, 6.2)  | 2.4  | 10 |
| 60 | Masks + Testing |       | Middle school student | 3.8 (-0.7, 9.1)  | 2.9  | 16 |
| 60 | Masks + Testing |       | High school student   | 1.9 (-0.4, 4.4)  | 1.6  | 13 |
| 60 | Masks + Testing | Equal | Elementary teacher    | 6.9 (-0.9, 15.3) | 5.4  |    |
| 60 | Masks + Testing | Half  | Elementary teacher    | 2.6 (-1.8, 7.6)  | 1.8  |    |
| 60 | Masks + Testing |       | Middle school teacher | 4.5 (-2.4, 15.2) | 2.3  |    |
| 60 | Masks + Testing |       | High school teacher   | 2.4 (-2, 9.4)    | 1.9  |    |
| 60 | Masks + Cohorts | Equal | Elementary student    | 3.1 (-0.4, 6.9)  | 2.5  | 12 |
| 60 | Masks + Cohorts | Half  | Elementary student    | 0.8 (-0.4, 2)    | 0.6  | 3  |
| 60 | Masks + Cohorts |       | Middle school student | 0.9 (-0.7, 2.6)  | 0.7  | 4  |
| 60 | Masks + Cohorts |       | High school student   | 0.4 (-0.6, 1.5)  | 0.3  | 3  |
| 60 | Masks + Cohorts | Equal | Elementary teacher    | 1.9 (-0.9, 6.1)  | 1.7  |    |
| 60 | Masks + Cohorts | Half  | Elementary teacher    | 0.7 (-1.8, 3.5)  | 0.8  |    |
| 60 | Masks + Cohorts |       | Middle school teacher | 0.8 (-2.4, 4.8)  | 0    |    |
| 60 | Masks + Cohorts |       | High school teacher   | 0.5 (-3.7, 3.9)  | 0    |    |
| 70 | None            | Equal | Elementary student    | 13.5 (7.3, 20.1) | 11.6 | 51 |
| 70 | None            | Half  | Elementary student    | 9.1 (4.3, 15)    | 8.7  | 35 |
| 70 | None            |       | Middle school student | 9.9 (4.7, 16.4)  | 9.7  | 41 |
| 70 | None            |       | High school student   | 8.2 (3.9, 12.8)  | 8.2  | 56 |
| 70 | None            | Equal | Elementary teacher    | 14.6 (2.5, 28.8) | 10.8 |    |
| 70 | None            | Half  | Elementary teacher    | 10.8 (0, 21.8)   | 8    |    |
| 70 | None            |       | Middle school teacher | 16 (0, 35)       | 11.1 |    |
| 70 | None            |       | High school teacher   | 15.2 (0, 35.3)   | 9.6  |    |
| 70 | Masks           | Equal | Elementary student    | 9.5 (3, 17.8)    | 7.3  | 36 |
| 70 | Masks           | Half  | Elementary student    | 3.4 (-0.2, 7.2)  | 3    | 13 |
| 70 | Masks           |       | Middle school student | 4.3 (0, 9.7)     | 3.4  | 18 |
| 70 | Masks           |       | High school student   | 1.8 (-0.2, 3.9)  | 1.6  | 12 |
| 70 | Masks           | Equal | Elementary teacher    | 6.9 (0, 15.7)    | 5.9  |    |
| 70 | Masks           | Half  | Elementary teacher    | 2.8 (-0.9, 7.8)  | 1.8  |    |
| 70 | Masks           |       | Middle school teacher | 4.5 (-2.3, 13.3) | 2.3  |    |
| 70 | Masks           |       | High school teacher   | 2.1 (-2.1, 5.9)  | 1.9  |    |
| 70 | Masks + Testing | Equal | Elementary student    | 7.4 (0.6, 15.7)  | 5.6  | 28 |
| 70 | Masks + Testing | Half  | Elementary student    | 1.8 (-0.5, 4.4)  | 1.2  | 7  |
| 70 | Masks + Testing |       | Middle school student | 2.4 (-0.5, 7.2)  | 1.4  | 10 |
| 70 | Masks + Testing |       | High school student   | 0.9 (-0.5, 2.7)  | 0.6  | 6  |
| 70 | Masks + Testing | Equal | Elementary teacher    | 4.9 (-0.9, 12.9) | 3.5  |    |
| 70 | Masks + Testing | Half  | Elementary teacher    | 1.4 (-1.8, 4.3)  | 0.9  |    |
| 70 | Masks + Testing |       | Middle school teacher | 2.4 (-2.4, 9.1)  | 2.1  |    |
| 70 | Masks + Testing |       | High school teacher   | 1 (-2, 5.6)      | 0    |    |

|    |                 |       |                       |                 |     |   |
|----|-----------------|-------|-----------------------|-----------------|-----|---|
| 70 | Masks + Cohorts | Equal | Elementary student    | 2.5 (-0.4, 5.7) | 1.8 | 9 |
| 70 | Masks + Cohorts | Half  | Elementary student    | 0.5 (-0.3, 1.6) | 0.4 | 2 |
| 70 | Masks + Cohorts |       | Middle school student | 0.6 (-0.7, 2)   | 0.4 | 3 |
| 70 | Masks + Cohorts |       | High school student   | 0.2 (-0.3, 1.1) | 0.2 | 2 |
| 70 | Masks + Cohorts | Equal | Elementary teacher    | 1.2 (-0.9, 4.4) | 0.9 |   |
| 70 | Masks + Cohorts | Half  | Elementary teacher    | 0.4 (-1.8, 2.6) | 0   |   |
| 70 | Masks + Cohorts |       | Middle school teacher | 0.6 (-2.3, 4.4) | 0   |   |
| 70 | Masks + Cohorts |       | High school teacher   | 0.2 (-2, 3.7)   | 0   |   |

\*Assuming a 380-person elementary school, 420-person middle school, and 680-person high school

**Table S7.** Excess infections (including asymptomatic infection) attributable to school transmission by population subgroup and scenario examined. Modelling parameters are given in Table S1.

| Vaccine coverage (%) | NPI             | Susceptibility of children <10 years | Population            | Mean (89% HPDI) excess infections per 100 population | Median excess infections per 100 population | Infections per school* |
|----------------------|-----------------|--------------------------------------|-----------------------|------------------------------------------------------|---------------------------------------------|------------------------|
| 50                   | None            | Equal                                | Elementary student    | 64.5 (37.7, 90.7)                                    | 64                                          | 245                    |
| 50                   | None            | Half                                 | Elementary student    | 48.6 (30.8, 70)                                      | 41.1                                        | 185                    |
| 50                   | None            |                                      | Middle school student | 56.9 (30.8, 85)                                      | 46.4                                        | 239                    |
| 50                   | None            |                                      | High school student   | 54.2 (31.8, 82.3)                                    | 43.6                                        | 368                    |
| 50                   | None            | Equal                                | Elementary teacher    | 37.2 (16.4, 58.6)                                    | 36.8                                        |                        |
| 50                   | None            | Half                                 | Elementary teacher    | 31.1 (12.2, 50.4)                                    | 28.7                                        |                        |
| 50                   | None            |                                      | Middle school teacher | 40.6 (8.7, 69.6)                                     | 37.4                                        |                        |
| 50                   | None            |                                      | High school teacher   | 41.8 (10.9, 74.5)                                    | 35.8                                        |                        |
| 50                   | Masks           | Equal                                | Elementary student    | 49.8 (21.9, 80.2)                                    | 35.1                                        | 189                    |
| 50                   | Masks           | Half                                 | Elementary student    | 23.5 (7.2, 42.2)                                     | 21.5                                        | 89                     |
| 50                   | Masks           |                                      | Middle school student | 32.9 (6.9, 62.6)                                     | 24.2                                        | 138                    |
| 50                   | Masks           |                                      | High school student   | 21.9 (6.3, 40.9)                                     | 20.3                                        | 149                    |
| 50                   | Masks           | Equal                                | Elementary teacher    | 20.4 (6.8, 33.9)                                     | 19.3                                        |                        |
| 50                   | Masks           | Half                                 | Elementary teacher    | 11 (0.8, 21.5)                                       | 10.5                                        |                        |
| 50                   | Masks           |                                      | Middle school teacher | 16.8 (0, 37)                                         | 14.3                                        |                        |
| 50                   | Masks           |                                      | High school teacher   | 13.2 (-2, 26.9)                                      | 11.5                                        |                        |
| 50                   | Masks + Testing | Equal                                | Elementary student    | 43.1 (16.2, 76.3)                                    | 31.5                                        | 164                    |
| 50                   | Masks + Testing | Half                                 | Elementary student    | 16.4 (2.5, 33.3)                                     | 14.7                                        | 62                     |
| 50                   | Masks + Testing |                                      | Middle school student | 25.3 (1.8, 54.1)                                     | 18                                          | 106                    |
| 50                   | Masks + Testing |                                      | High school student   | 15.5 (1.1, 30.4)                                     | 14.1                                        | 106                    |
| 50                   | Masks + Testing | Equal                                | Elementary teacher    | 16.3 (2.6, 29.3)                                     | 15.5                                        |                        |
| 50                   | Masks + Testing | Half                                 | Elementary teacher    | 7.6 (-1.8, 16.4)                                     | 6.9                                         |                        |
| 50                   | Masks + Testing |                                      | Middle school teacher | 12.3 (-2.4, 30.4)                                    | 10.9                                        |                        |
| 50                   | Masks + Testing |                                      | High school teacher   | 8.9 (-2, 22.6)                                       | 7.5                                         |                        |
| 50                   | Masks + Cohorts | Equal                                | Elementary student    | 17.1 (0.5, 36.6)                                     | 12.4                                        | 65                     |
| 50                   | Masks + Cohorts | Half                                 | Elementary student    | 4.5 (-1.2, 9)                                        | 3.9                                         | 17                     |
| 50                   | Masks + Cohorts |                                      | Middle school student | 6 (-1.8, 13.8)                                       | 4.3                                         | 25                     |
| 50                   | Masks + Cohorts |                                      | High school student   | 3.3 (-0.6, 7.2)                                      | 2.9                                         | 22                     |
| 50                   | Masks + Cohorts | Equal                                | Elementary teacher    | 5.1 (-0.9, 11.8)                                     | 5.1                                         |                        |
| 50                   | Masks + Cohorts | Half                                 | Elementary teacher    | 1.8 (-3.6, 6.8)                                      | 1.7                                         |                        |
| 50                   | Masks + Cohorts |                                      | Middle school teacher | 2.3 (-4.9, 11.1)                                     | 2.2                                         |                        |
| 50                   | Masks + Cohorts |                                      | High school teacher   | 1.7 (-4, 9.3)                                        | 1.9                                         |                        |
| 60                   | None            | Equal                                | Elementary student    | 63 (35.5, 92.5)                                      | 45.3                                        | 240                    |
| 60                   | None            | Half                                 | Elementary student    | 44.8 (25.9, 69.9)                                    | 37.2                                        | 170                    |
| 60                   | None            |                                      | Middle school student | 53.1 (26.9, 83.8)                                    | 40.2                                        | 223                    |
| 60                   | None            |                                      | High school student   | 48.9 (26.9, 77.6)                                    | 38                                          | 333                    |
| 60                   | None            | Equal                                | Elementary teacher    | 32.8 (12.8, 54.3)                                    | 29.5                                        |                        |
| 60                   | None            | Half                                 | Elementary teacher    | 25.9 (10.1, 46.6)                                    | 22.7                                        |                        |
| 60                   | None            |                                      | Middle school teacher | 35.9 (6.4, 65.2)                                     | 29.5                                        |                        |
| 60                   | None            |                                      | High school teacher   | 36.2 (9.1, 70.4)                                     | 28.2                                        |                        |
| 60                   | Masks           | Equal                                | Elementary student    | 46.6 (18.4, 80.7)                                    | 30.7                                        | 177                    |
| 60                   | Masks           | Half                                 | Elementary student    | 19.2 (4.1, 40.3)                                     | 16.3                                        | 73                     |

|    |                 |       |                       |                   |      |     |
|----|-----------------|-------|-----------------------|-------------------|------|-----|
| 60 | Masks           |       | Middle school student | 26.2 (4.2, 56.4)  | 18   | 110 |
| 60 | Masks           |       | High school student   | 13.7 (-0.2, 23.4) | 13.1 | 93  |
| 60 | Masks           | Equal | Elementary teacher    | 16.5 (3.4, 29.2)  | 15.7 |     |
| 60 | Masks           | Half  | Elementary teacher    | 7.9 (0, 16.7)     | 7    |     |
| 60 | Masks           |       | Middle school teacher | 12.2 (0, 30.4)    | 9.3  |     |
| 60 | Masks           |       | High school teacher   | 7.7 (-2, 17.6)    | 7.3  |     |
| 60 | Masks + Testing | Equal | Elementary student    | 38 (9.3, 76.3)    | 25.5 | 145 |
| 60 | Masks + Testing | Half  | Elementary student    | 12 (-0.9, 27.8)   | 9.5  | 46  |
| 60 | Masks + Testing |       | Middle school student | 17.7 (-1.7, 45)   | 11.2 | 74  |
| 60 | Masks + Testing |       | High school student   | 8.3 (-1.4, 17.3)  | 7.2  | 57  |
| 60 | Masks + Testing | Equal | Elementary teacher    | 12.5 (0.9, 25.2)  | 11.2 |     |
| 60 | Masks + Testing | Half  | Elementary teacher    | 4.6 (-1.8, 12.2)  | 3.5  |     |
| 60 | Masks + Testing |       | Middle school teacher | 7.8 (-4.5, 21.4)  | 4.7  |     |
| 60 | Masks + Testing |       | High school teacher   | 4.6 (-2, 14.3)    | 3.8  |     |
| 60 | Masks + Cohorts | Equal | Elementary student    | 13.8 (-0.1, 33.1) | 9.4  | 53  |
| 60 | Masks + Cohorts | Half  | Elementary student    | 3.2 (-0.7, 7.7)   | 2.4  | 12  |
| 60 | Masks + Cohorts |       | Middle school student | 4.1 (-2, 10)      | 2.7  | 17  |
| 60 | Masks + Cohorts |       | High school student   | 1.8 (-1, 4.3)     | 1.5  | 12  |
| 60 | Masks + Cohorts | Equal | Elementary teacher    | 3.4 (-1.8, 8.4)   | 3.4  |     |
| 60 | Masks + Cohorts | Half  | Elementary teacher    | 1.2 (-1.8, 5.3)   | 0.9  |     |
| 60 | Masks + Cohorts |       | Middle school teacher | 1.5 (-4.5, 6.7)   | 2.1  |     |
| 60 | Masks + Cohorts |       | High school teacher   | 1 (-3.9, 5.9)     | 1.8  |     |
| 70 | None            | Equal | Elementary student    | 60.1 (30.7, 92.2) | 39.8 | 228 |
| 70 | None            | Half  | Elementary student    | 39.9 (19.1, 69.1) | 32.4 | 152 |
| 70 | None            |       | Middle school student | 47.3 (20.9, 80.7) | 34.3 | 199 |
| 70 | None            |       | High school student   | 28 (7.9, 48.3)    | 22.2 |     |
| 70 | None            | Equal | Elementary teacher    | 20.6 (5.2, 40.4)  | 16.9 |     |
| 70 | None            | Half  | Elementary teacher    | 30 (2.1, 59.5)    | 22.2 |     |
| 70 | None            |       | Middle school teacher | 40.5 (18.4, 72.2) | 31.9 |     |
| 70 | None            |       | High school teacher   | 28.9 (3.6, 62.3)  | 20   |     |
| 70 | Masks           | Equal | Elementary student    | 42.7 (13.5, 81.3) | 25.4 | 162 |
| 70 | Masks           | Half  | Elementary student    | 15 (0, 34)        | 12   | 57  |
| 70 | Masks           |       | Middle school student | 20.3 (-0.5, 47.1) | 13.5 | 85  |
| 70 | Masks           |       | High school student   | 7.9 (-0.3, 15.3)  | 7.6  | 54  |
| 70 | Masks           | Equal | Elementary teacher    | 13.1 (0.8, 24.8)  | 11.9 |     |
| 70 | Masks           | Half  | Elementary teacher    | 5.5 (-0.9, 12.8)  | 4.5  |     |
| 70 | Masks           |       | Middle school teacher | 8.3 (-2.3, 20.8)  | 6.5  |     |
| 70 | Masks           |       | High school teacher   | 4.2 (-2, 11.1)    | 3.7  |     |
| 70 | Masks + Testing | Equal | Elementary student    | 33.3 (5, 75.5)    | 21.2 | 126 |
| 70 | Masks + Testing | Half  | Elementary student    | 7.7 (-1.3, 19.5)  | 5.2  | 29  |
| 70 | Masks + Testing |       | Middle school student | 11.1 (-1.3, 33.7) | 5.9  | 47  |
| 70 | Masks + Testing |       | High school student   | 4 (-0.9, 9.7)     | 2.8  | 27  |
| 70 | Masks + Testing | Equal | Elementary teacher    | 9.4 (-0.9, 20.7)  | 7.8  |     |
| 70 | Masks + Testing | Half  | Elementary teacher    | 2.7 (-1.8, 7.6)   | 1.8  |     |
| 70 | Masks + Testing |       | Middle school teacher | 4.3 (-4.5, 13.6)  | 2.3  |     |
| 70 | Masks + Testing |       | High school teacher   | 2 (-2, 7.7)       | 1.9  |     |

|    |                 |       |                       |                   |     |    |
|----|-----------------|-------|-----------------------|-------------------|-----|----|
| 70 | Masks + Cohorts | Equal | Elementary student    | 11.4 (-0.8, 27.5) | 7.3 | 43 |
| 70 | Masks + Cohorts | Half  | Elementary student    | 2.3 (-0.7, 6.1)   | 1.5 | 9  |
| 70 | Masks + Cohorts |       | Middle school student | 2.9 (-1.1, 7.9)   | 1.5 | 12 |
| 70 | Masks + Cohorts |       | High school student   | 1 (-0.6, 3.2)     | 0.8 | 7  |
| 70 | Masks + Cohorts | Equal | Elementary teacher    | 2.4 (-0.9, 7)     | 1.8 |    |
| 70 | Masks + Cohorts | Half  | Elementary teacher    | 0.8 (-1.8, 3.5)   | 0.9 |    |
| 70 | Masks + Cohorts |       | Middle school teacher | 1.1 (-2.4, 6.7)   | 0   |    |
| 70 | Masks + Cohorts |       | High school teacher   | 0.4 (-3.8, 3.8)   | 0   |    |

\*Assuming a 380-person elementary school, 420-person middle school, and 680-person high school



**Table S8.** Excess hospitalizations attributable to school transmission using parameters specified in Table S1. Results are stratified by levels of community vaccination coverage and within-school non-pharmaceutical intervention (NPI). M/T = masks + testing; M/C = masks + cohorts.

| NPI   | Susceptibility of children <10 years | Population            | 50% coverage                                                  |                                                      | 60% coverage                                                  |                                                      | 70% coverage                                                  |                                                      |
|-------|--------------------------------------|-----------------------|---------------------------------------------------------------|------------------------------------------------------|---------------------------------------------------------------|------------------------------------------------------|---------------------------------------------------------------|------------------------------------------------------|
|       |                                      |                       | Mean (89% HPDI) excess hospitalizations per 100,00 population | Median excess hospitalizations per 100,00 population | Mean (89% HPDI) excess hospitalizations per 100,00 population | Median excess hospitalizations per 100,00 population | Mean (89% HPDI) excess hospitalizations per 100,00 population | Median excess hospitalizations per 100,00 population |
| None  | Equal                                | Elementary student    | 12.9 (0, 41.8)                                                | 0                                                    | 10.3 (0, 31.9)                                                | 0                                                    | 6.5 (0, 21.5)                                                 | 0                                                    |
| None  | Half                                 | Elementary student    | 11.4 (0, 41)                                                  | 0                                                    | 8.2 (0, 30.9)                                                 | 0                                                    | 5.2 (0, 21.1)                                                 | 0                                                    |
| None  |                                      | Middle school student | 12.6 (0, 44.2)                                                | 0                                                    | 8.3 (0, 40.4)                                                 | 0                                                    | 6.9 (0, 22.8)                                                 | 0                                                    |
| None  |                                      | High school student   | 12.3 (0, 46.5)                                                | 0                                                    | 8.7 (0, 33)                                                   | 0                                                    | 5.7 (0, 21.8)                                                 | 0                                                    |
| None  | Equal                                | Elementary teacher    | 68.9 (0, 252.1)                                               | 84                                                   | 58.4 (0, 175.4)                                               | 0                                                    | 6.4 (0, 30.8)                                                 | 0                                                    |
| None  | Half                                 | Elementary teacher    | 66.1 (0, 177)                                                 | 84                                                   | 53 (0, 173.9)                                                 | 0                                                    | 42 (0, 170.9)                                                 | 0                                                    |
| None  |                                      | Middle school teacher | 77.7 (0, 232.6)                                               | 0                                                    | 69.1 (0, 227.3)                                               | 0                                                    | 31.8 (0, 89.3)                                                | 0                                                    |
| None  |                                      | High school teacher   | 83 (0, 357.1)                                                 | 0                                                    | 62.3 (0, 196.1)                                               | 0                                                    | 50.9 (0, 222.2)                                               | 0                                                    |
| Masks | Equal                                | Elementary student    | 8.1 (0, 31.5)                                                 | 0                                                    | 5.5 (0, 22.1)                                                 | 0                                                    | 3.4 (0, 20.2)                                                 | 0                                                    |
| Masks | Half                                 | Elementary student    | 5.1 (0, 31.4)                                                 | 0                                                    | 3.1 (0, 21.4)                                                 | 0                                                    | 1.8 (0, 10.9)                                                 | 0                                                    |
| Masks |                                      | Middle school student | 5.4 (0, 40.2)                                                 | 0                                                    | 3.2 (0, 21.7)                                                 | 0                                                    | 1.7 (0, 20.4)                                                 | 0                                                    |
| Masks |                                      | High school student   | 4.8 (0, 34.4)                                                 | 0                                                    | 3.2 (0, 17.8)                                                 | 0                                                    | 1.6 (0, 16.2)                                                 | 0                                                    |
| Masks | Equal                                | Elementary teacher    | 40.1 (0, 170.9)                                               | 0                                                    | 30.7 (0, 90.1)                                                | 0                                                    | 17.5 (0, 87.7)                                                | 0                                                    |
| Masks | Half                                 | Elementary teacher    | 24.8 (0, 168.1)                                               | 0                                                    | 12.6 (0, 87.7)                                                | 0                                                    | 6.3 (0, 85.5)                                                 | 0                                                    |
| Masks |                                      | Middle school teacher | 29.4 (0, 222.2)                                               | 0                                                    | 24.2 (0, 217.4)                                               | 0                                                    | 14.2 (0, 0)                                                   | 0                                                    |
| Masks |                                      | High school teacher   | 21.9 (0, 188.7)                                               | 0                                                    | 13.9 (0, 178.6)                                               | 0                                                    | 6.5 (0, 0)                                                    | 0                                                    |
| M/T   | Equal                                | Elementary student    | 6.4 (0, 31.4)                                                 | 0                                                    | 3.8 (0, 21)                                                   | 0                                                    | 2.3 (0, 10.7)                                                 | 0                                                    |
| M/T   | Half                                 | Elementary student    | 3.2 (-10.7, 20.8)                                             | 0                                                    | 1.8 (0, 20.9)                                                 | 0                                                    | 0.7 (0, 10.4)                                                 | 0                                                    |
| M/T   |                                      | Middle school student | 4.1 (0, 41.2)                                                 | 0                                                    | 2.3 (0, 21.3)                                                 | 0                                                    | 2.2 (0, 20.7)                                                 | 0                                                    |
| M/T   |                                      | High school student   | 4.1 (0, 45.9)                                                 | 0                                                    | 1.3 (0, 16.3)                                                 | 0                                                    | 0.6 (0, 0)                                                    | 0                                                    |
| M/T   | Equal                                | Elementary teacher    | 30.7 (0, 172.4)                                               | 0                                                    | 22.6 (0, 88.5)                                                | 0                                                    | 0.9 (0, 15.8)                                                 | 0                                                    |
| M/T   | Half                                 | Elementary teacher    | 18.7 (0, 89.3)                                                | 0                                                    | 8.7 (0, 87.7)                                                 | 0                                                    | 14.2 (0, 87.7)                                                | 0                                                    |
| M/T   |                                      | Middle school teacher | 22.1 (0, 222.2)                                               | 0                                                    | 17.6 (0, 0)                                                   | 0                                                    | 3.5 (0, 0)                                                    | 0                                                    |
| M/T   |                                      | High school teacher   | 18.2 (0, 192.3)                                               | 0                                                    | 9.3 (0, 0)                                                    | 0                                                    | 9.5 (0, 0)                                                    | 0                                                    |
| M/C   | Equal                                | Elementary student    | 1.8 (-10.9, 11.1)                                             | 0                                                    | 1.3 (0, 20.6)                                                 | 0                                                    | 1 (0, 10.5)                                                   | 0                                                    |
| M/C   | Half                                 | Elementary student    | 1.2 (-10.9, 10.9)                                             | 0                                                    | 0.5 (-10.5, 10.6)                                             | 0                                                    | 0.3 (0, 10.6)                                                 | 0                                                    |
| M/C   |                                      | Middle school student | 1.6 (0, 40.6)                                                 | 0                                                    | 0.4 (-20.7, 0)                                                | 0                                                    | 0.5 (0, 0)                                                    | 0                                                    |

|     |       |                       |                 |   |                |   |                 |   |
|-----|-------|-----------------------|-----------------|---|----------------|---|-----------------|---|
| M/C |       | High school student   | 1 (-16.1, 16.2) | 0 | 0.3 (0, 16.7)  | 0 | -0.1 (-14.7, 0) | 0 |
| M/C | Equal | Elementary teacher    | 9.6 (0, 89.3)   | 0 | 6.5 (0, 87.7)  | 0 | 2.1 (0, 0)      | 0 |
| M/C | Half  | Elementary teacher    | 7 (0, 87.7)     | 0 | 1.9 (-86.2, 0) | 0 | 1 (0, 0)        | 0 |
| M/C |       | Middle school teacher | 4.6 (0, 0)      | 0 | 4.4 (0, 0)     | 0 | 5.1 (0, 0)      | 0 |
| M/C |       | High school teacher   | 3.5 (-185.2, 0) | 0 | 2.1 (0, 0)     | 0 | 0.8 (0, 0)      | 0 |

**Table S9.** Excess infections (all, symptomatic, and severe) among household members of students and general community members, stratified by vaccination coverage and within-school intervention. Modelling parameters are as seen in Table S1.

| Vaccination coverage (%) | Population       | Within –school intervention | Excess infections (any) per 100 population |        | Excess symptomatic infections per 100 population |        | Excess hospitalizations per 100,000 population |        |
|--------------------------|------------------|-----------------------------|--------------------------------------------|--------|--------------------------------------------------|--------|------------------------------------------------|--------|
|                          |                  |                             | Mean (89% HPDI)                            | Median | Mean (89% HPDI)                                  | Median | Mean (89% HPDI)                                | Median |
| 50                       | Community member | No NPIs                     | 14.7 (10.2, 20.3)                          | 14.7   | 8.6 (6.1, 11.5)                                  | 8.8    | 34.9 (19.2, 50.8)                              | 35.3   |
| 50                       | Household member | No NPIs                     | 26.4 (15.2, 39.2)                          | 23.5   | 10.9 (8.5, 13.6)                                 | 11.1   | 34.7 (8.2, 65.4)                               | 33.8   |
| 50                       | Community member | Masks                       | 6 (0.9, 10.9)                              | 6      | 3.5 (0.5, 6.4)                                   | 3.5    | 14.1 (0.9, 29.8)                               | 14.1   |
| 50                       | Household member | Masks                       | 12.1 (2.3, 21.9)                           | 10.9   | 4.9 (1.4, 8.1)                                   | 5.1    | 15.7 (-4.5, 38.5)                              | 12.9   |
| 50                       | Community member | Masks +testing              | 3.8 (-0.7, 8)                              | 3.8    | 2.2 (-0.7, 4.5)                                  | 2.1    | 8.9 (-4.5, 22)                                 | 8.8    |
| 50                       | Household member | Masks +testing              | 8.3 (0, 17.5)                              | 7.4    | 3.3 (0.1, 6.3)                                   | 3.3    | 9.4 (-8.9, 30.1)                               | 8.5    |
| 50                       | Community member | Masks +cohorts              | 1.1 (-1.7, 3.6)                            | 1.1    | 0.7 (-1.2, 2.2)                                  | 0.6    | 2.6 (-7.1, 13.2)                               | 2.6    |
| 50                       | Household member | Masks +cohorts              | 2.2 (-1, 5.3)                              | 2.1    | 0.9 (-0.7, 2.5)                                  | 0.9    | 2.6 (-13.1, 20.7)                              | 4.1    |
| 60                       | Community member | No NPIs                     | 11 (6.6, 16.4)                             | 11     | 6.1 (3.5, 8.6)                                   | 6.3    | 23.8 (11.3, 38)                                | 23.9   |
| 60                       | Household member | No NPIs                     | 22.3 (11.2, 36.6)                          | 18.9   | 8.6 (5.9, 11.5)                                  | 8.9    | 25.1 (0, 47)                                   | 24.9   |
| 60                       | Community member | Masks                       | 3.7 (0.4, 7.4)                             | 3.6    | 2.1 (0.2, 4.1)                                   | 2      | 7.9 (-0.9, 18.4)                               | 7.9    |
| 60                       | Household member | Masks                       | 8.4 (0.3, 16.3)                            | 7.4    | 3.2 (0.8, 6)                                     | 3.2    | 9.1 (-4.4, 25.7)                               | 8.5    |
| 60                       | Community member | Masks +testing              | 2.1 (-0.8, 5.2)                            | 1.9    | 1.1 (-0.5, 2.9)                                  | 1      | 4.4 (-4.4, 14)                                 | 3.6    |
| 60                       | Household member | Masks +testing              | 5.1 (-1, 12)                               | 4.2    | 1.9 (-0.3, 4.5)                                  | 1.8    | 5.4 (-8.7, 21.3)                               | 4.3    |
| 60                       | Community member | Masks +cohorts              | 0.7 (-1, 2.4)                              | 0.6    | 0.4 (-0.7, 1.4)                                  | 0.3    | 1.5 (-5.3, 8.9)                                | 1.7    |
| 60                       | Household member | Masks +cohorts              | 1.4 (-0.9, 3.9)                            | 1.3    | 0.5 (-0.6, 1.7)                                  | 0.5    | 1.3 (-8.7, 13)                                 | 0      |
| 70                       | Community member | No NPIs                     | 7.3 (3.2, 12.6)                            | 7.4    | 3.8 (1.6, 6.2)                                   | 4      | 14.1 (2.6, 23.9)                               | 14.2   |
| 70                       | Household member | No NPIs                     | 17.7 (5.7, 32.3)                           | 13.4   | 6.2 (3.2, 9.5)                                   | 6.5    | 16 (0, 34.1)                                   | 13     |
| 70                       | Community member | Masks                       | 2.2 (-0.4, 4.6)                            | 2      | 1.1 (-0.2, 2.4)                                  | 1      | 4.1 (-1.8, 11.5)                               | 3.5    |
| 70                       | Household member | Masks                       | 5.8 (-0.7, 13)                             | 4.6    | 2 (0, 4)                                         | 1.9    | 4.7 (-4.4, 17.1)                               | 4.2    |
| 70                       | Community member | Masks +testing              | 1 (-0.6, 3)                                | 0.7    | 0.5 (-0.5, 1.5)                                  | 0.4    | 1.9 (-3.6, 7.9)                                | 1.8    |
| 70                       | Household member | Masks +testing              | 2.9 (-1, 8.5)                              | 1.7    | 1 (-0.5, 2.7)                                    | 0.8    | 2.1 (-4.4, 16.7)                               | 0      |
| 70                       | Community member | Masks +cohorts              | 0.3 (-0.7, 1.3)                            | 0.3    | 0.2 (-0.4, 0.8)                                  | 0.2    | 0.7 (-3.5, 5.3)                                | 0.9    |
| 70                       | Household member | Masks +cohorts              | 0.9 (-0.6, 2.6)                            | 0.7    | 0.3 (-0.5, 1)                                    | 0.3    | 0.7 (-8.6, 8.6)                                | 0      |

## Supplemental results assuming lower infectiousness of asymptomatic individuals

In the main text, we assume that asymptomatic individuals are 50% as likely to transmit infection as compared to symptomatic individuals. Here, we explore results, assuming they are 30% as likely to transmit. In equation 1, this corresponds to an  $\alpha$  value of 0.3.

**Table S10.** The minimum non-pharmaceutical intervention to reduce the risk of symptomatic infection to beneath a given threshold (e.g., 50 cases per 1,000 population), assuming that 70% of the vaccine-eligible community has received a vaccine and the relative infectiousness of asymptomatic individuals ( $\alpha$ ) is 0.3. All other modelling parameters besides  $\alpha$  are given in Table S1. ‘Not observed’ indicates that no combination of interventions examined in this study reduced excess risk beneath the indicated threshold.

|          |                                                 | Threshold - symptomatic cases per 1,000 population |                 |                 | < 2 cases per school* |
|----------|-------------------------------------------------|----------------------------------------------------|-----------------|-----------------|-----------------------|
|          |                                                 | <50                                                | <25             | <10             |                       |
| Students | Elementary school – <i>half susceptibility</i>  | Masks                                              | Masks           | Masks + testing | Masks + testing       |
|          | Elementary school – <i>equal susceptibility</i> | Masks + testing                                    | Masks + cohorts | Masks + cohorts | Not observed**        |
|          | Middle school                                   | Masks                                              | Masks           | Masks + testing | Masks + cohorts       |
|          | High school                                     | Masks                                              | Masks           | Masks           | Masks + testing       |
| Teachers | Elementary school – <i>half susceptibility</i>  | Masks                                              | Masks           | Masks           |                       |
|          | Elementary school – <i>equal susceptibility</i> | Masks                                              | Masks + testing | Masks + testing |                       |
|          | Middle school                                   | Masks                                              | Masks           | Masks + testing |                       |
|          | High school                                     | Masks                                              | Masks           | Masks           |                       |

\*Assuming a 380-person elementary school, 420-person middle school, and 680-person high school

\*\*not observed under the specific combination of interventions simulated

**Table S11.** Excess *symptomatic* infections attributable to school transmission by population subgroup and scenario examined, using parameters in Table S1 and  $\alpha = 0.3$

| Vaccine coverage (%) | NPI             | Susceptibility of children <10 years | Population            | Mean (89% HPDI) excess infections per 100 population | Median excess infections per 100 population | Infections per school* |
|----------------------|-----------------|--------------------------------------|-----------------------|------------------------------------------------------|---------------------------------------------|------------------------|
| 50                   | None            | Equal                                | Elementary student    | 13.2 (8.2, 18.9)                                     | 13.1                                        | 50                     |
| 50                   | None            | Half                                 | Elementary student    | 8.2 (4.7, 11.7)                                      | 8.3                                         | 31                     |
| 50                   | None            |                                      | Middle school student | 10.9 (5.2, 17)                                       | 10.7                                        | 46                     |
| 50                   | None            |                                      | High school student   | 9.8 (4.9, 14.2)                                      | 9.7                                         | 67                     |
| 50                   | None            | Equal                                | Elementary teacher    | 16.9 (3.4, 32.2)                                     | 14.5                                        |                        |
| 50                   | None            | Half                                 | Elementary teacher    | 11.8 (1.7, 23.7)                                     | 10.4                                        |                        |
| 50                   | None            |                                      | Middle school teacher | 19.1 (0, 40.4)                                       | 15.6                                        |                        |
| 50                   | None            |                                      | High school teacher   | 19.5 (0, 40.7)                                       | 15.4                                        |                        |
| 50                   | Masks           | Equal                                | Elementary student    | 7.4 (1.9, 13.7)                                      | 6.5                                         | 28                     |
| 50                   | Masks           | Half                                 | Elementary student    | 2.5 (0, 4.9)                                         | 2.4                                         | 10                     |
| 50                   | Masks           |                                      | Middle school student | 4.1 (0, 9.3)                                         | 3.5                                         | 17                     |
| 50                   | Masks           |                                      | High school student   | 2.2 (0, 4.8)                                         | 2                                           | 15                     |
| 50                   | Masks           | Equal                                | Elementary teacher    | 6.5 (0, 15.5)                                        | 5.3                                         |                        |
| 50                   | Masks           | Half                                 | Elementary teacher    | 2.8 (-1.8, 7.9)                                      | 2.6                                         |                        |
| 50                   | Masks           |                                      | Middle school teacher | 5 (-4.5, 15.2)                                       | 4.3                                         |                        |
| 50                   | Masks           |                                      | High school teacher   | 3.1 (-3.9, 9.4)                                      | 2                                           |                        |
| 50                   | Masks + Testing | Equal                                | Elementary student    | 5.6 (-0.1, 11.3)                                     | 4.7                                         | 21                     |
| 50                   | Masks + Testing | Half                                 | Elementary student    | 1.5 (-0.5, 3.5)                                      | 1.3                                         | 6                      |
| 50                   | Masks + Testing |                                      | Middle school student | 2.6 (-0.4, 7.1)                                      | 1.9                                         | 11                     |
| 50                   | Masks + Testing |                                      | High school student   | 1.3 (-0.5, 3.3)                                      | 1.1                                         | 9                      |
| 50                   | Masks + Testing | Equal                                | Elementary teacher    | 4.4 (-1.8, 11.4)                                     | 3.5                                         |                        |
| 50                   | Masks + Testing | Half                                 | Elementary teacher    | 1.5 (-2.7, 5.3)                                      | 1.7                                         |                        |
| 50                   | Masks + Testing |                                      | Middle school teacher | 2.7 (-4.7, 9.5)                                      | 2.2                                         |                        |
| 50                   | Masks + Testing |                                      | High school teacher   | 1.8 (-3.8, 7.4)                                      | 1.9                                         |                        |
| 50                   | Masks + Cohorts | Equal                                | Elementary student    | 1.5 (-0.4, 3.7)                                      | 1.3                                         | 6                      |
| 50                   | Masks + Cohorts | Half                                 | Elementary student    | 0.5 (-0.6, 1.8)                                      | 0.5                                         | 2                      |
| 50                   | Masks + Cohorts |                                      | Middle school student | 0.6 (-1, 2.3)                                        | 0.6                                         | 3                      |
| 50                   | Masks + Cohorts |                                      | High school student   | 0.3 (-0.8, 1.6)                                      | 0.3                                         | 2                      |
| 50                   | Masks + Cohorts | Equal                                | Elementary teacher    | 1 (-1.8, 5.1)                                        | 0.9                                         |                        |
| 50                   | Masks + Cohorts | Half                                 | Elementary teacher    | 0.5 (-2.7, 3.6)                                      | 0.8                                         |                        |
| 50                   | Masks + Cohorts |                                      | Middle school teacher | 0.5 (-4.7, 4.9)                                      | 0                                           |                        |
| 50                   | Masks + Cohorts |                                      | High school teacher   | 0.4 (-4, 4.1)                                        | 0                                           |                        |
| 60                   | None            | Equal                                | Elementary student    | 12.1 (6.7, 19)                                       | 10.9                                        | 46                     |
| 60                   | None            | Half                                 | Elementary student    | 6.7 (3, 11.4)                                        | 6.7                                         | 26                     |
| 60                   | None            |                                      | Middle school student | 9.2 (3.4, 16)                                        | 8.7                                         | 39                     |
| 60                   | None            |                                      | High school student   | 7.6 (3.4, 12.9)                                      | 7.3                                         | 51                     |
| 60                   | None            | Equal                                | Elementary teacher    | 13.6 (1.7, 27.1)                                     | 11.1                                        |                        |
| 60                   | None            | Half                                 | Elementary teacher    | 8.7 (0, 18.3)                                        | 7.1                                         |                        |
| 60                   | None            |                                      | Middle school teacher | 15.4 (0, 36.2)                                       | 12.5                                        |                        |
| 60                   | None            |                                      | High school teacher   | 14.5 (0, 34)                                         | 9.6                                         |                        |
| 60                   | Masks           | Equal                                | Elementary student    | 6.5 (0.5, 12.6)                                      | 5.3                                         | 25                     |
| 60                   | Masks           | Half                                 | Elementary student    | 1.8 (-0.3, 3.9)                                      | 1.6                                         | 7                      |

|    |                 |       |                       |                   |     |    |
|----|-----------------|-------|-----------------------|-------------------|-----|----|
| 60 | Masks           |       | Middle school student | 2.8 (-0.7, 7)     | 2   | 12 |
| 60 | Masks           |       | High school student   | 1.2 (-0.3, 2.9)   | 1   | 8  |
| 60 | Masks           | Equal | Elementary teacher    | 4.9 (-0.9, 11.6)  | 4.2 |    |
| 60 | Masks           | Half  | Elementary teacher    | 1.7 (-1.8, 5.2)   | 1.7 |    |
| 60 | Masks           |       | Middle school teacher | 2.9 (-2.3, 10.9)  | 2.2 |    |
| 60 | Masks           |       | High school teacher   | 1.6 (-2, 7.3)     | 1.8 |    |
| 60 | Masks + Testing | Equal | Elementary student    | 4.2 (-0.4, 9.9)   | 3.2 | 16 |
| 60 | Masks + Testing | Half  | Elementary student    | 0.9 (-0.4, 2.5)   | 0.7 | 3  |
| 60 | Masks + Testing |       | Middle school student | 1.4 (-1.2, 4.1)   | 0.8 | 6  |
| 60 | Masks + Testing |       | High school student   | 0.6 (-0.5, 2)     | 0.5 | 4  |
| 60 | Masks + Testing | Equal | Elementary teacher    | 2.9 (-1.8, 8)     | 2.5 |    |
| 60 | Masks + Testing | Half  | Elementary teacher    | 0.7 (-1.8, 3.6)   | 0.8 |    |
| 60 | Masks + Testing |       | Middle school teacher | 1.2 (-2.4, 8.7)   | 0   |    |
| 60 | Masks + Testing |       | High school teacher   | 0.8 (-2.1, 5.7)   | 0   |    |
| 60 | Masks + Cohorts | Equal | Elementary student    | 1.2 (-0.8, 3.2)   | 0.9 | 5  |
| 60 | Masks + Cohorts | Half  | Elementary student    | 0.3 (-0.5, 1.3)   | 0.3 | 1  |
| 60 | Masks + Cohorts |       | Middle school student | 0.4 (-0.9, 1.6)   | 0.2 | 2  |
| 60 | Masks + Cohorts |       | High school student   | 0.2 (-0.5, 1.2)   | 0.2 | 1  |
| 60 | Masks + Cohorts | Equal | Elementary teacher    | 0.8 (-1.8, 3.5)   | 0.9 |    |
| 60 | Masks + Cohorts | Half  | Elementary teacher    | 0.2 (-1.8, 2.7)   | 0   |    |
| 60 | Masks + Cohorts |       | Middle school teacher | 0.2 (-4.4, 4.4)   | 0   |    |
| 60 | Masks + Cohorts |       | High school teacher   | 0.2 (-3.6, 3.9)   | 0   |    |
| 70 | None            | Equal | Elementary student    | 10.9 (4.6, 18.9)  | 8.9 | 42 |
| 70 | None            | Half  | Elementary student    | 5.3 (0.9, 10)     | 5   | 20 |
| 70 | None            |       | Middle school student | 7.3 (0.2, 13.5)   | 6.5 | 30 |
| 70 | None            |       | High school student   | 5 (0, 8.7)        | 5   | 34 |
| 70 | None            | Equal | Elementary teacher    | 10.7 (0, 22.1)    | 7.9 |    |
| 70 | None            | Half  | Elementary teacher    | 5.8 (-0.9, 14.5)  | 4.3 |    |
| 70 | None            |       | Middle school teacher | 11.3 (-2.3, 28.3) | 6.7 |    |
| 70 | None            |       | High school teacher   | 9.1 (-2, 24.5)    | 5.5 |    |
| 70 | Masks           | Equal | Elementary student    | 5.6 (-0.2, 12.1)  | 4.1 | 21 |
| 70 | Masks           | Half  | Elementary student    | 1.3 (-0.3, 3.2)   | 1   | 5  |
| 70 | Masks           |       | Middle school student | 2 (-0.5, 5.9)     | 1.1 | 8  |
| 70 | Masks           |       | High school student   | 0.7 (-0.3, 1.9)   | 0.5 | 4  |
| 70 | Masks           | Equal | Elementary teacher    | 3.4 (-0.9, 9.3)   | 2.6 |    |
| 70 | Masks           | Half  | Elementary teacher    | 1 (-1.8, 3.4)     | 0.9 |    |
| 70 | Masks           |       | Middle school teacher | 1.6 (-2.4, 6.5)   | 0   |    |
| 70 | Masks           |       | High school teacher   | 0.9 (-2, 3.8)     | 0   |    |
| 70 | Masks + Testing | Equal | Elementary student    | 3.4 (-0.4, 9.3)   | 2.3 | 13 |
| 70 | Masks + Testing | Half  | Elementary student    | 0.5 (-0.5, 1.5)   | 0.3 | 2  |
| 70 | Masks + Testing |       | Middle school student | 0.8 (-0.7, 2.7)   | 0.4 | 3  |
| 70 | Masks + Testing |       | High school student   | 0.3 (-0.5, 1.1)   | 0.2 | 2  |
| 70 | Masks + Testing | Equal | Elementary teacher    | 1.9 (-1.8, 6.1)   | 0.9 |    |
| 70 | Masks + Testing | Half  | Elementary teacher    | 0.3 (-1.8, 2.6)   | 0   |    |
| 70 | Masks + Testing |       | Middle school teacher | 0.7 (-2.3, 4.4)   | 0   |    |
| 70 | Masks + Testing |       | High school teacher   | 0.3 (-2, 3.7)     | 0   |    |

|    |                 |       |                       |                 |     |   |
|----|-----------------|-------|-----------------------|-----------------|-----|---|
| 70 | Masks + Cohorts | Equal | Elementary student    | 0.9 (-0.4, 2.7) | 0.6 | 3 |
| 70 | Masks + Cohorts | Half  | Elementary student    | 0.2 (-0.3, 0.9) | 0.2 | 1 |
| 70 | Masks + Cohorts |       | Middle school student | 0.3 (-0.7, 1.1) | 0.2 | 1 |
| 70 | Masks + Cohorts |       | High school student   | 0.1 (-0.5, 0.7) | 0   | 1 |
| 70 | Masks + Cohorts | Equal | Elementary teacher    | 0.4 (-1.8, 2.6) | 0   |   |
| 70 | Masks + Cohorts | Half  | Elementary teacher    | 0.1 (-1.8, 1.8) | 0   |   |
| 70 | Masks + Cohorts |       | Middle school teacher | 0.2 (-2.3, 2.3) | 0   |   |
| 70 | Masks + Cohorts |       | High school teacher   | 0.1 (-3.6, 2)   | 0   |   |

\*Assuming a 380-person elementary school, 420-person middle school, and 680-person high school

**Table S12.** Excess infections (including asymptomatic infection) attributable to school transmission by population subgroup and scenario examined, using parameters in Table S1 and  $\alpha = 0.3$ .

| Vaccine coverage (%) | NPI             | Susceptibility of children <10 years | Population            | Mean (89% HPDI) excess infections per 100 population | Median excess infections per 100 population | Infections per school* |
|----------------------|-----------------|--------------------------------------|-----------------------|------------------------------------------------------|---------------------------------------------|------------------------|
| 50                   | None            | Equal                                | Elementary student    | 56.2 (30.9, 85.3)                                    | 41.1                                        | 214                    |
| 50                   | None            | Half                                 | Elementary student    | 34 (20.9, 54.8)                                      | 30.8                                        | 129                    |
| 50                   | None            |                                      | Middle school student | 49 (21.6, 81.4)                                      | 35                                          | 206                    |
| 50                   | None            |                                      | High school student   | 44.9 (21.8, 74.3)                                    | 33.8                                        | 305                    |
| 50                   | None            | Equal                                | Elementary teacher    | 29 (10.3, 49.2)                                      | 26.4                                        |                        |
| 50                   | None            | Half                                 | Elementary teacher    | 20.6 (5.9, 36.2)                                     | 19.1                                        |                        |
| 50                   | None            |                                      | Middle school teacher | 33.1 (6.4, 65.1)                                     | 26.8                                        |                        |
| 50                   | None            |                                      | High school teacher   | 33.4 (5.7, 66.1)                                     | 25.9                                        |                        |
| 50                   | Masks           | Equal                                | Elementary student    | 32.5 (7, 62.6)                                       | 22.8                                        | 124                    |
| 50                   | Masks           | Half                                 | Elementary student    | 10.5 (0.4, 19.4)                                     | 9.4                                         | 40                     |
| 50                   | Masks           |                                      | Middle school student | 18.5 (0.7, 42.3)                                     | 12.1                                        | 78                     |
| 50                   | Masks           |                                      | High school student   | 11.2 (0, 21)                                         | 10.4                                        |                        |
| 50                   | Masks           | Equal                                | Elementary teacher    | 4.8 (-1.8, 11.6)                                     | 4.4                                         |                        |
| 50                   | Masks           | Half                                 | Elementary teacher    | 8.4 (-4.8, 22.2)                                     | 6.7                                         |                        |
| 50                   | Masks           |                                      | Middle school teacher | 5.4 (-3.9, 13.7)                                     | 5.5                                         |                        |
| 50                   | Masks           |                                      | High school teacher   | 24.3 (1.6, 53.1)                                     | 17                                          | 92                     |
| 50                   | Masks + Testing | Equal                                | Elementary student    | 6.2 (-1, 12.7)                                       | 5.2                                         | 24                     |
| 50                   | Masks + Testing | Half                                 | Elementary student    | 11.6 (-1.4, 29.8)                                    | 7                                           | 49                     |
| 50                   | Masks + Testing |                                      | Middle school student | 5.8 (-0.5, 13)                                       | 4.9                                         | 39                     |
| 50                   | Masks + Testing |                                      | High school student   | 7.7 (-1.8, 16.8)                                     | 7                                           |                        |
| 50                   | Masks + Testing | Equal                                | Elementary teacher    | 2.7 (-2.7, 8.5)                                      | 2.6                                         |                        |
| 50                   | Masks + Testing | Half                                 | Elementary teacher    | 4.7 (-4.9, 16.3)                                     | 4.3                                         |                        |
| 50                   | Masks + Testing |                                      | Middle school teacher | 3.1 (-3.8, 11.5)                                     | 2                                           |                        |
| 50                   | Masks + Testing |                                      | High school teacher   | 6.8 (-1.1, 15.2)                                     | 5                                           | 26                     |
| 50                   | Masks + Cohorts | Equal                                | Elementary student    | 2.1 (-1, 5.3)                                        | 1.8                                         | 8                      |
| 50                   | Masks + Cohorts | Half                                 | Elementary student    | 2.8 (-1.3, 7.9)                                      | 2.1                                         | 12                     |
| 50                   | Masks + Cohorts |                                      | Middle school student | 1.5 (-1.1, 4.3)                                      | 1.2                                         | 10                     |
| 50                   | Masks + Cohorts |                                      | High school student   | 1.7 (-3.6, 5.8)                                      | 1.7                                         |                        |
| 50                   | Masks + Cohorts | Equal                                | Elementary teacher    | 0.9 (-3.5, 5.3)                                      | 0.9                                         |                        |
| 50                   | Masks + Cohorts | Half                                 | Elementary teacher    | 0.9 (-4.7, 8.7)                                      | 0                                           |                        |
| 50                   | Masks + Cohorts |                                      | Middle school teacher | 0.8 (-5.8, 5.9)                                      | 0                                           |                        |
| 50                   | Masks + Cohorts |                                      | High school teacher   | 53 (25.6, 84.8)                                      | 37                                          | 201                    |
| 60                   | None            | Equal                                | Elementary student    | 28.7 (12.6, 50.9)                                    | 26.2                                        | 109                    |
| 60                   | None            | Half                                 | Elementary student    | 42.9 (15.7, 76.4)                                    | 30.8                                        | 180                    |
| 60                   | None            |                                      | Middle school student | 36.3 (14.8, 67.3)                                    | 28                                          | 247                    |
| 60                   | None            |                                      | High school student   | 24.4 (6.8, 44)                                       | 21.2                                        |                        |
| 60                   | None            | Equal                                | Elementary teacher    | 15.5 (1.7, 29.3)                                     | 13.8                                        |                        |
| 60                   | None            | Half                                 | Elementary teacher    | 26.9 (0, 54.3)                                       | 21.5                                        |                        |
| 60                   | None            |                                      | Middle school teacher | 26 (1.8, 54)                                         | 18.5                                        |                        |
| 60                   | None            |                                      | High school teacher   | 29.2 (5.6, 61.7)                                     | 19.3                                        | 111                    |
| 60                   | Masks           | Equal                                | Elementary student    | 7.7 (-0.4, 16.1)                                     | 6.3                                         | 29                     |
| 60                   | Masks           | Half                                 | Elementary student    | 12.9 (-0.9, 34.5)                                    | 7.6                                         | 54                     |



|    |                 |       |                       |                   |      |     |
|----|-----------------|-------|-----------------------|-------------------|------|-----|
| 60 | Masks           |       | Middle school student | 5.4 (-0.7, 11)    | 4.4  | 37  |
| 60 | Masks           |       | High school student   | 8.7 (0, 18.3)     | 7.8  |     |
| 60 | Masks           | Equal | Elementary teacher    | 3 (-1.8, 8)       | 2.6  |     |
| 60 | Masks           | Half  | Elementary teacher    | 5 (-4.7, 15.2)    | 4.3  |     |
| 60 | Masks           |       | Middle school teacher | 3 (-2, 9.8)       | 2    |     |
| 60 | Masks           |       | High school teacher   | 18.9 (-0.5, 47.2) | 12.8 | 72  |
| 60 | Masks + Testing | Equal | Elementary student    | 3.8 (-0.8, 8.8)   | 2.7  | 14  |
| 60 | Masks + Testing | Half  | Elementary student    | 6.5 (-2.1, 17.8)  | 3.2  | 28  |
| 60 | Masks + Testing |       | Middle school student | 2.8 (-1.1, 7.1)   | 2    | 19  |
| 60 | Masks + Testing |       | High school student   | 5.3 (-1.8, 13.2)  | 4.4  |     |
| 60 | Masks + Testing | Equal | Elementary teacher    | 1.3 (-1.8, 6.1)   | 0.9  |     |
| 60 | Masks + Testing | Half  | Elementary teacher    | 2.3 (-4.8, 10.9)  | 2.2  |     |
| 60 | Masks + Testing |       | Middle school teacher | 1.5 (-3.8, 7.4)   | 1.8  |     |
| 60 | Masks + Testing |       | High school teacher   | 5.4 (-1.2, 14.3)  | 3.4  | 20  |
| 60 | Masks + Cohorts | Equal | Elementary student    | 1.4 (-1, 3.8)     | 1    | 5   |
| 60 | Masks + Cohorts | Half  | Elementary student    | 1.7 (-1.9, 4.6)   | 1.2  | 7   |
| 60 | Masks + Cohorts |       | Middle school student | 0.8 (-0.9, 2.7)   | 0.7  | 6   |
| 60 | Masks + Cohorts |       | High school student   | 1.3 (-3.5, 4.4)   | 0.9  |     |
| 60 | Masks + Cohorts | Equal | Elementary teacher    | 0.4 (-2.7, 3.5)   | 0    |     |
| 60 | Masks + Cohorts | Half  | Elementary teacher    | 0.5 (-4.7, 6.5)   | 0    |     |
| 60 | Masks + Cohorts |       | Middle school teacher | 0.6 (-3.9, 5.6)   | 0    |     |
| 60 | Masks + Cohorts |       | High school teacher   | 49.2 (19.4, 84)   | 32.7 | 187 |
| 70 | None            | Equal | Elementary student    | 23.4 (6.1, 48.8)  | 20.7 | 89  |
| 70 | None            | Half  | Elementary student    | 35.3 (7.7, 70.9)  | 23.9 | 148 |
| 70 | None            |       | Middle school student | 25 (1.1, 51.8)    | 20.6 | 170 |
| 70 | None            |       | High school student   | 20.2 (4.2, 38.5)  | 15.8 |     |
| 70 | None            | Equal | Elementary teacher    | 11 (0, 23.9)      | 9.2  |     |
| 70 | None            | Half  | Elementary teacher    | 20.8 (0, 48.9)    | 13.5 |     |
| 70 | None            |       | Middle school teacher | 16.6 (0, 42.6)    | 10.8 |     |
| 70 | None            |       | High school teacher   | 25.7 (-0.1, 57)   | 16.3 | 98  |
| 70 | Masks           | Equal | Elementary student    | 5.9 (-0.6, 14.1)  | 4.2  | 22  |
| 70 | Masks           | Half  | Elementary student    | 9.3 (-1, 27.7)    | 4.5  | 39  |
| 70 | Masks           |       | Middle school student | 2.9 (-0.5, 6.9)   | 2.3  | 20  |
| 70 | Masks           |       | High school student   | 6.5 (0, 15.4)     | 5.3  |     |
| 70 | Masks           | Equal | Elementary teacher    | 1.9 (-1.8, 5.9)   | 1.7  |     |
| 70 | Masks           | Half  | Elementary teacher    | 3.1 (-2.3, 11.4)  | 2.2  |     |
| 70 | Masks           |       | Middle school teacher | 1.5 (-2.1, 6.1)   | 1.8  |     |
| 70 | Masks           |       | High school teacher   | 15.2 (-1.3, 41.7) | 9.4  | 58  |
| 70 | Masks + Testing | Equal | Elementary student    | 2.3 (-0.9, 6.1)   | 1.2  | 9   |
| 70 | Masks + Testing | Half  | Elementary student    | 3.7 (-1.5, 10.1)  | 1.4  | 15  |
| 70 | Masks + Testing |       | Middle school student | 1.3 (-0.8, 3.7)   | 0.8  | 9   |
| 70 | Masks + Testing |       | High school student   | 3.7 (-2.7, 10.3)  | 2.6  |     |
| 70 | Masks + Testing | Equal | Elementary teacher    | 0.7 (-1.8, 3.5)   | 0.8  |     |
| 70 | Masks + Testing | Half  | Elementary teacher    | 1.3 (-2.3, 6.8)   | 0    |     |
| 70 | Masks + Testing |       | Middle school teacher | 0.6 (-3.8, 3.8)   | 0    |     |
| 70 | Masks + Testing |       | High school teacher   | 4.1 (-0.9, 10.3)  | 2.4  | 15  |

|    |                 |       |                       |                   |      |     |
|----|-----------------|-------|-----------------------|-------------------|------|-----|
| 70 | Masks + Cohorts | Equal | Elementary student    | 1 (-0.7, 2.8)     | 0.7  | 4   |
| 70 | Masks + Cohorts | Half  | Elementary student    | 1.2 (-1.1, 3.6)   | 0.7  | 5   |
| 70 | Masks + Cohorts |       | Middle school student | 0.5 (-0.7, 1.8)   | 0.4  | 4   |
| 70 | Masks + Cohorts |       | High school student   | 0.9 (-1.8, 3.6)   | 0.9  |     |
| 70 | Masks + Cohorts | Equal | Elementary teacher    | 0.2 (-1.8, 3.4)   | 0    |     |
| 70 | Masks + Cohorts | Half  | Elementary teacher    | 0.3 (-2.4, 4.7)   | 0    |     |
| 70 | Masks + Cohorts |       | Middle school teacher | 0.2 (-3.8, 3.8)   | 0    |     |
| 70 | Masks + Cohorts |       | High school teacher   | 56.2 (30.9, 85.3) | 41.1 | 214 |

\*Assuming a 380-person elementary school, 420-person middle school, and 680-person high school

Table S13. Excess hospitalizations attributable to school transmission using parameters specified in Table S1. Results are stratified by levels of community vaccination coverage and within-school non-pharmaceutical intervention (NPI). M/T = masks + testing; M/C = masks + cohorts.

| NPI   | Susceptibility of children <10 years | Population            | 50% coverage                                                  |                                                      | 60% coverage                                                  |                                                      | 70% coverage                                                  |                                                      |
|-------|--------------------------------------|-----------------------|---------------------------------------------------------------|------------------------------------------------------|---------------------------------------------------------------|------------------------------------------------------|---------------------------------------------------------------|------------------------------------------------------|
|       |                                      |                       | Mean (89% HPDI) excess hospitalizations per 100,00 population | Median excess hospitalizations per 100,00 population | Mean (89% HPDI) excess hospitalizations per 100,00 population | Median excess hospitalizations per 100,00 population | Mean (89% HPDI) excess hospitalizations per 100,00 population | Median excess hospitalizations per 100,00 population |
| None  | Equal                                | Elementary student    | 8.9, (0, 32)                                                  | 0                                                    | 6.4, (0, 21.6)                                                | 0                                                    | 4.2, (0, 20.6)                                                | 0                                                    |
| None  | Half                                 | Elementary student    | 7.9, (0, 32.5)                                                | 0                                                    | 4.7, (0, 21.7)                                                | 0                                                    | 3.2, (0, 11.2)                                                | 0                                                    |
| None  |                                      | Middle school student | 7.5, (0, 41.5)                                                | 0                                                    | 4.9, (0, 21.7)                                                | 0                                                    | 3.2, (0, 20.8)                                                | 0                                                    |
| None  |                                      | High school student   | 7.7, (0, 32.7)                                                | 0                                                    | 5.2, (0, 30.5)                                                | 0                                                    | 2.8, (0, 16.1)                                                | 0                                                    |
| None  | Equal                                | Elementary teacher    | 54.1, (0, 175.4)                                              | 0                                                    | 43, (0, 170.9)                                                | 0                                                    | 31, (0, 88.5)                                                 | 0                                                    |
| None  | Half                                 | Elementary teacher    | 40.6, (0, 172.4)                                              | 0                                                    | 29.2, (0, 88.5)                                               | 0                                                    | 17.3, (0, 87.7)                                               | 0                                                    |
| None  |                                      | Middle school teacher | 64.6, (0, 232.6)                                              | 0                                                    | 50.9, (0, 222.2)                                              | 0                                                    | 29.5, (0, 217.4)                                              | 0                                                    |
| None  |                                      | High school teacher   | 55.8, (0, 196.1)                                              | 0                                                    | 53.3, (0, 192.3)                                              | 0                                                    | 26, (0, 185.2)                                                | 0                                                    |
| Masks | Equal                                | Elementary student    | 3.8, (0, 31.2)                                                | 0                                                    | 2.6, (0, 20.3)                                                | 0                                                    | 1.3, (0, 10.8)                                                | 0                                                    |
| Masks | Half                                 | Elementary student    | 1.7, (-11.4, 18.5)                                            | 0                                                    | 1.1, (0, 20.3)                                                | 0                                                    | 0.7, (0, 10.4)                                                | 0                                                    |
| Masks |                                      | Middle school student | 1.9, (0, 41)                                                  | 0                                                    | 1.6, (0, 20.7)                                                | 0                                                    | 0.9, (0, 0)                                                   | 0                                                    |
| Masks |                                      | High school student   | 2, (-16.2, 16)                                                | 0                                                    | 1.9, (0, 16.9)                                                | 0                                                    | 0.7, (0, 15.3)                                                | 0                                                    |
| Masks | Equal                                | Elementary teacher    | 22.3, (0, 89.3)                                               | 0                                                    | 17.1, (0, 87.7)                                               | 0                                                    | 11.6, (0, 86.2)                                               | 0                                                    |
| Masks | Half                                 | Elementary teacher    | 12.1, (0, 89.3)                                               | 0                                                    | 7.7, (0, 86.2)                                                | 0                                                    | 3.9, (0, 82.6)                                                | 0                                                    |
| Masks |                                      | Middle school teacher | 14.4, (0, 217.4)                                              | 0                                                    | 9.6, (0, 0)                                                   | 0                                                    | 2.3, (0, 0)                                                   | 0                                                    |
| Masks |                                      | High school teacher   | 10.2, (0, 185.2)                                              | 0                                                    | 6.1, (0, 0)                                                   | 0                                                    | 0.2, (0, 0)                                                   | 0                                                    |
| M/T   | Equal                                | Elementary student    | 2.6, (-10.9, 19.9)                                            | 0                                                    | 1.5, (0, 11)                                                  | 0                                                    | 0.9, (0, 10.5)                                                | 0                                                    |
| M/T   | Half                                 | Elementary student    | 0.7, (-11.1, 11.1)                                            | 0                                                    | 0.3, (0, 20.8)                                                | 0                                                    | 0.3, (0, 10)                                                  | 0                                                    |
| M/T   |                                      | Middle school student | 1.6, (0, 22.7)                                                | 0                                                    | 0.7, (0, 20.5)                                                | 0                                                    | 0.6, (0, 0)                                                   | 0                                                    |
| M/T   |                                      | High school student   | 1.2, (-15.9, 16.1)                                            | 0                                                    | 0.4, (-16.2, 0)                                               | 0                                                    | 0.3, (0, 0)                                                   | 0                                                    |
| M/T   | Equal                                | Elementary teacher    | 16, (0, 88.5)                                                 | 0                                                    | 10.1, (0, 86.2)                                               | 0                                                    | 4.7, (0, 0)                                                   | 0                                                    |
| M/T   | Half                                 | Elementary teacher    | 5.4, (0, 87.7)                                                | 0                                                    | 3.8, (-84.7, 0)                                               | 0                                                    | 0.9, (0, 0)                                                   | 0                                                    |
| M/T   |                                      | Middle school teacher | 8.8, (-217.4, 0)                                              | 0                                                    | 7.7, (0, 0)                                                   | 0                                                    | 1.9, (0, 0)                                                   | 0                                                    |
| M/T   |                                      | High school teacher   | 1.8, (0, 0)                                                   | 0                                                    | 3.4, (0, 0)                                                   | 0                                                    | -2.8, (0, 0)                                                  | 0                                                    |
| M/C   | Equal                                | Elementary student    | 0.8, (-10.8, 10.8)                                            | 0                                                    | 0.7, (0, 10.9)                                                | 0                                                    | 0.2, (0, 10.3)                                                | 0                                                    |
| M/C   | Half                                 | Elementary student    | 0.1, (-10.7, 10.6)                                            | 0                                                    | -0.1, (-10.4, 10.5)                                           | 0                                                    | 0.2, (0, 10.1)                                                | 0                                                    |
| M/C   |                                      | Middle school student | 0.1, (0, 22.8)                                                | 0                                                    | 0, (-19.3, 0)                                                 | 0                                                    | 0.5, (0, 0)                                                   | 0                                                    |

|     |       |                       |                    |   |                |   |             |   |
|-----|-------|-----------------------|--------------------|---|----------------|---|-------------|---|
| M/C |       | High school student   | 0·4, (-15·9, 16·2) | 0 | 0·5, (0, 16·1) | 0 | 0·3, (0, 0) | 0 |
| M/C | Equal | Elementary teacher    | 9·6 (0, 89·3)      | 0 | 6·5 (0, 87·7)  | 0 | 2·1 (0, 0)  | 0 |
| M/C | Half  | Elementary teacher    | 7 (0, 87·7)        | 0 | 1·9 (-86·2, 0) | 0 | 1 (0, 0)    | 0 |
| M/C |       | Middle school teacher | 4·6 (0, 0)         | 0 | 4·4 (0, 0)     | 0 | 5·1 (0, 0)  | 0 |
| M/C |       | High school teacher   | 3·5 (-185·2, 0)    | 0 | 2·1 (0, 0)     | 0 | 0·8 (0, 0)  | 0 |

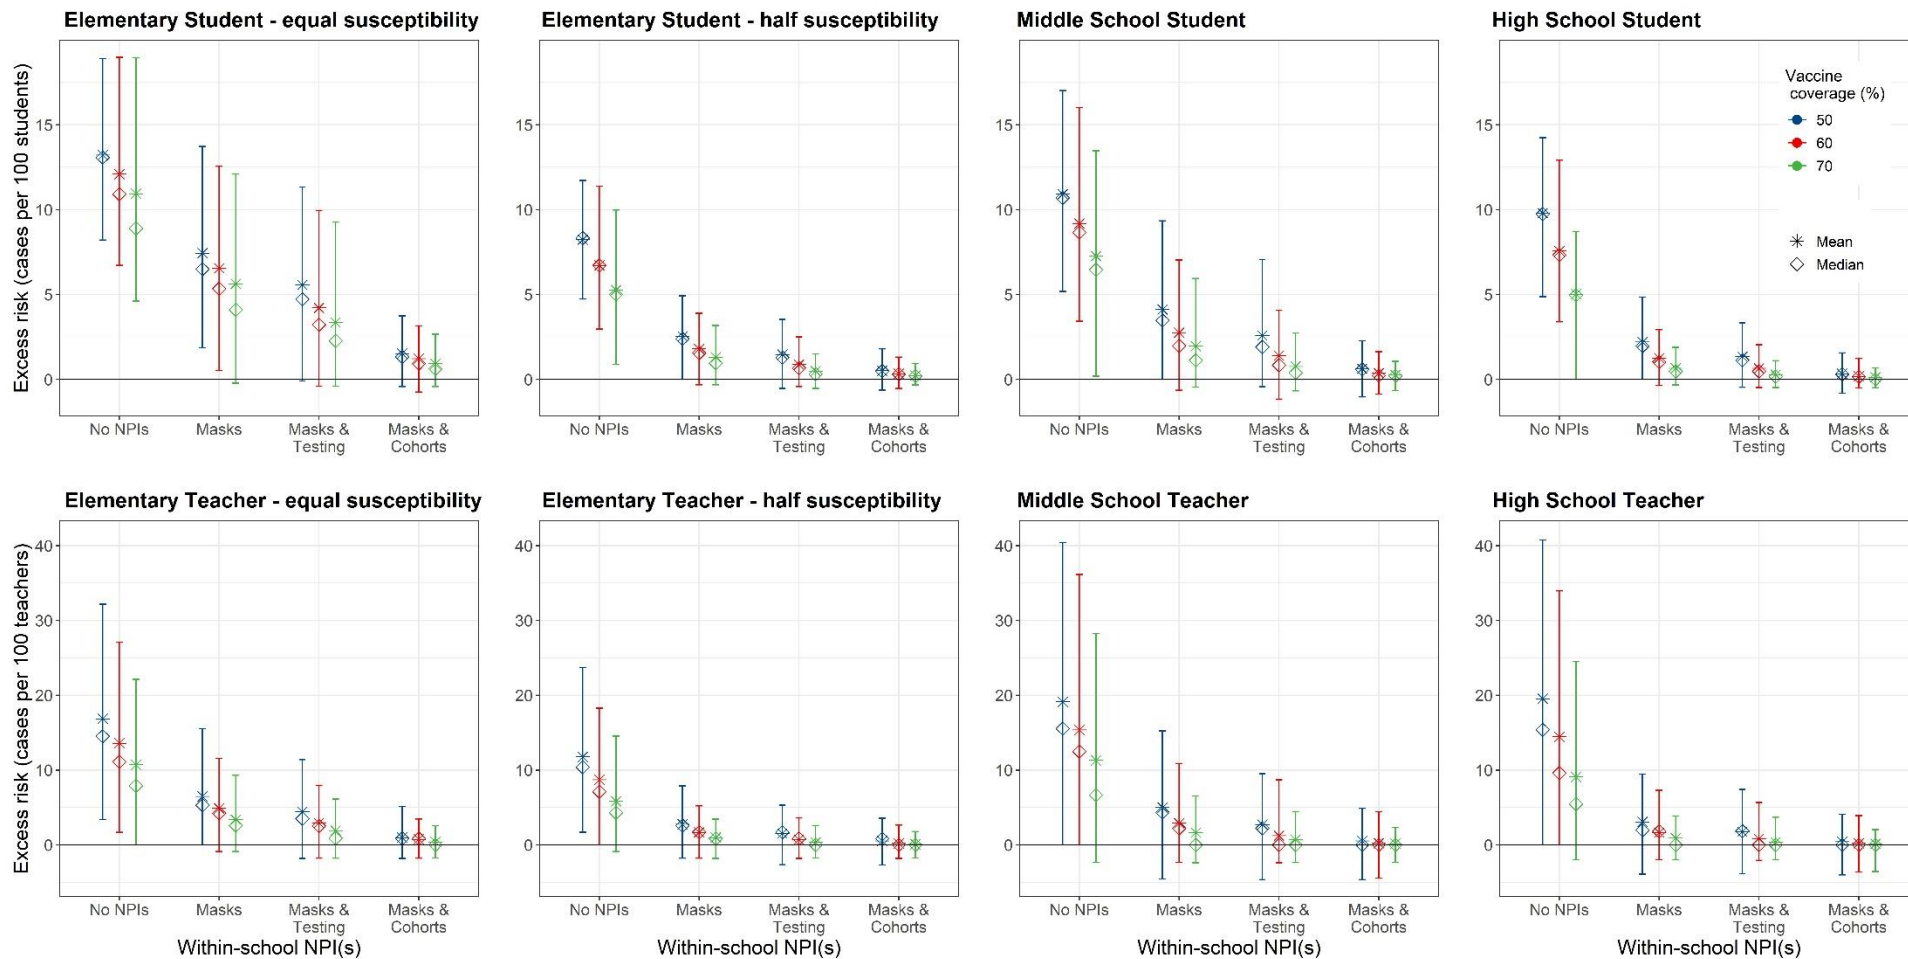

**Figure S2. Effect of non-pharmaceutical interventions under lower infectiousness of asymptomatic carriers ( $\alpha=0.3$ ).** We examined the effect of three non-pharmaceutical interventions across three levels of community vaccination coverage (50%, 60%, 70%), assuming that vaccination coverage within school children 12+ and teachers matches that in the community and the vaccine effectiveness is 77% against infection, 85% against symptomatic infection, and 93% against severe infection. Here, the relative infectiousness of asymptomatic carriers is set at 0.3, rather than 0.5, as in the text. Masks indicate universal masks regardless of vaccination status. We calculated the mean (stars) and median (diamonds) of excess cases per 100 persons attributable to school transmission among population subgroups across 1,000 model realizations. Vertical lines reflect the 89<sup>th</sup> percentile high probability density interval (HPDI).

## Supplemental results for Alpha variant

### Effect of within-school precautions under various community vaccination coverages – Alpha variant

**Table S14.** Excess symptomatic infections attributable to school transmission assuming circulation of the Alpha variant only. Results are stratified by levels of community vaccination coverage and within-school non-pharmaceutical intervention (NPI).

| NPI   | Susceptibility of children <10 years | Population            | 50% coverage                                         |                                             | 60% coverage                                         |                                             | 70% coverage                                         |                                             |
|-------|--------------------------------------|-----------------------|------------------------------------------------------|---------------------------------------------|------------------------------------------------------|---------------------------------------------|------------------------------------------------------|---------------------------------------------|
|       |                                      |                       | Mean (89% HPDI) excess infections per 100 population | Median excess infections per 100 population | Mean (89% HPDI) excess infections per 100 population | Median excess infections per 100 population | Mean (89% HPDI) excess infections per 100 population | Median excess infections per 100 population |
| None  | Equal                                | Elementary student    | 2.4 (-0.2, 6.9)                                      | 1.4                                         | 1.8 (-0.2, 5.5)                                      | 0.7                                         | 1.3 (-0.2, 4.3)                                      | 0.2                                         |
| None  | Half                                 | Elementary student    | 0.5 (-0.2, 1.2)                                      | 0.2                                         | 0.3 (-0.1, 1)                                        | 0.1                                         | 0.2 (-0.1, 0.7)                                      | 0                                           |
| None  |                                      | Middle school student | 2.4 (-0.2, 7.9)                                      | 0.6                                         | 1.4 (-0.2, 5.4)                                      | 0                                           | 0.8 (-0.2, 3)                                        | 0                                           |
| None  |                                      | High school student   | 1 (-0.2, 3.6)                                        | 0.2                                         | 0.3 (-0.2, 1)                                        | 0                                           | 0.1 (0, 0.3)                                         | 0                                           |
| None  | Equal                                | Elementary teacher    | 2.8 (-0.9, 8.4)                                      | 1.7                                         | 1.8 (-0.9, 6.7)                                      | 0.9                                         | 1 (-0.9, 4.3)                                        | 0                                           |
| None  | Half                                 | Elementary teacher    | 0.8 (-1.8, 2.7)                                      | 0.8                                         | 0.4 (-0.9, 2.6)                                      | 0                                           | 0.2 (-0.9, 1.7)                                      | 0                                           |
| None  |                                      | Middle school teacher | 4.1 (-2.4, 14.9)                                     | 0                                           | 2 (-2.3, 8.9)                                        | 0                                           | 0.9 (-2.3, 4.4)                                      | 0                                           |
| None  |                                      | High school teacher   | 2.4 (-2, 9.4)                                        | 0                                           | 0.7 (-2, 3.8)                                        | 0                                           | 0.2 (-1.9, 1.9)                                      | 0                                           |
| Masks | Equal                                | Elementary student    | 0.5 (-0.2, 1.6)                                      | 0.2                                         | 0.4 (-0.2, 1.1)                                      | 0.1                                         | 0.3 (-0.2, 0.9)                                      | 0                                           |
| Masks | Half                                 | Elementary student    | 0.1 (-0.1, 0.3)                                      | 0                                           | 0.1 (-0.1, 0.3)                                      | 0                                           | 0.1 (-0.1, 0.2)                                      | 0                                           |
| Masks |                                      | Middle school student | 0.2 (-0.3, 0.7)                                      | 0                                           | 0.1 (-0.2, 0.4)                                      | 0                                           | 0.1 (0, 0.4)                                         | 0                                           |
| Masks |                                      | High school student   | 0.1 (-0.2, 0.3)                                      | 0                                           | 0 (0, 0.3)                                           | 0                                           | 0 (0, 0.2)                                           | 0                                           |
| Masks | Equal                                | Elementary teacher    | 0.4 (-0.9, 2.5)                                      | 0                                           | 0.2 (-0.9, 1.8)                                      | 0                                           | 0.1 (-0.9, 1.7)                                      | 0                                           |
| Masks | Half                                 | Elementary teacher    | 0.1 (-0.9, 1.8)                                      | 0                                           | 0.1 (-0.9, 1.7)                                      | 0                                           | 0 (-0.9, 0.9)                                        | 0                                           |
| Masks |                                      | Middle school teacher | 0.3 (-2.3, 2.3)                                      | 0                                           | 0 (-2.3, 2.2)                                        | 0                                           | 0.1 (-2.3, 2.2)                                      | 0                                           |
| Masks |                                      | High school teacher   | 0.1 (-2, 1.9)                                        | 0                                           | 0 (-1.9, 1.9)                                        | 0                                           | 0 (-1.9, 1.9)                                        | 0                                           |

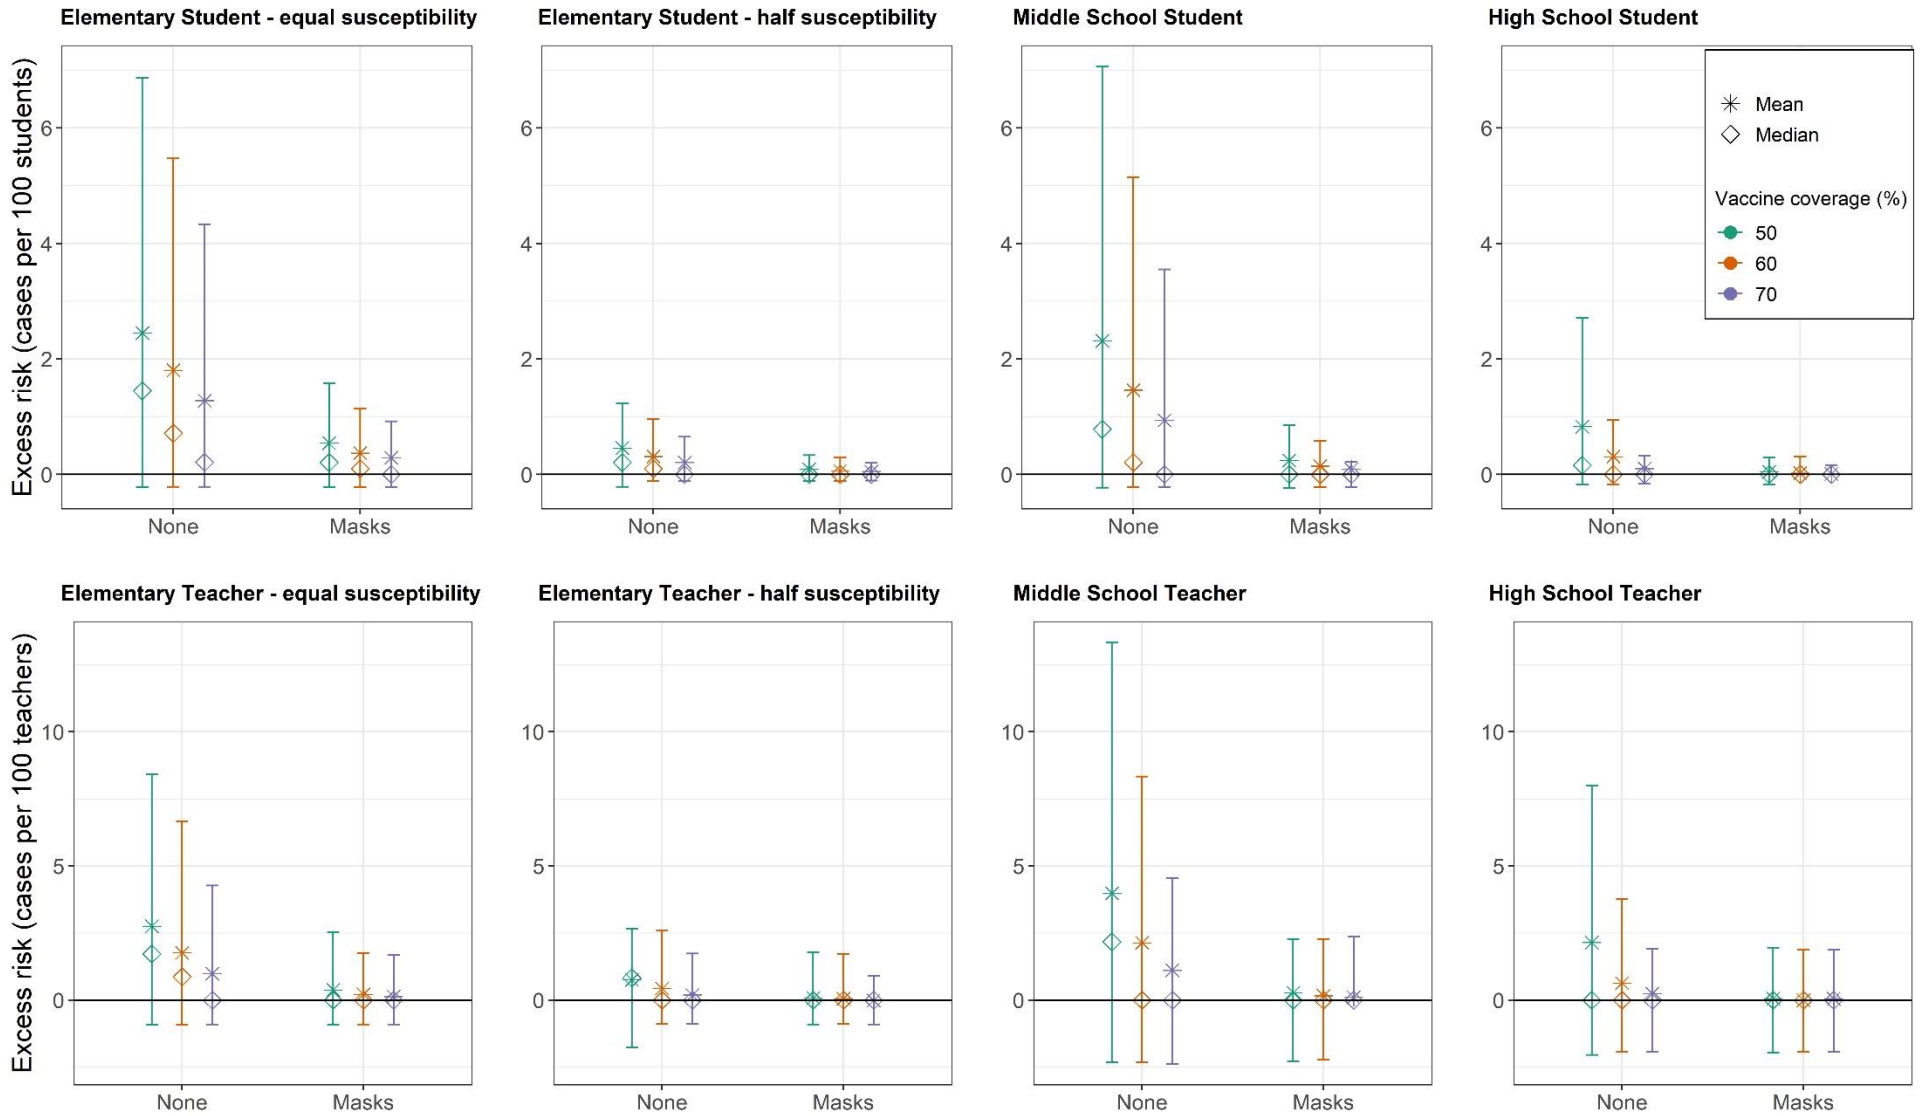

**Figure S3.** We examined the effect of masks across three levels of community vaccination coverage (50%, 60%, 70%), assuming circulation of the Alpha variant only, and that the vaccine effectiveness is 85% against symptomatic infection. We examined the results across two assumptions about the susceptibility of children (children <10 half as susceptible to SARS-CoV-2 as those 10+ vs. equally susceptible across all ages). We calculated the mean (stars) and median (diamonds) of excess cases per 100 persons attributable to school transmission among population subgroups across 1,000 model realizations. Vertical lines reflect the 89<sup>th</sup> percentile high probability density interval (HPDI).

Interventions required to reduce incidence attributable within schools below certain risk thresholds – Alpha variant

**Table S15.** The minimum non-pharmaceutical intervention(s), or minimum within-school vaccination coverage of the eligible population, needed to reduce the risk of symptomatic infection to beneath a given threshold (e.g., 50 cases per 1,000 population), assuming that 70% of the vaccine-eligible community has received a vaccine at 85% effectiveness. Simulations examine circulation of the Alpha variant alone.

|                 |                                          | <b>Threshold - symptomatic cases per 1,000 population</b> |                            |                                     |                                     | <b>&lt; 1 case per school**</b> |
|-----------------|------------------------------------------|-----------------------------------------------------------|----------------------------|-------------------------------------|-------------------------------------|---------------------------------|
|                 |                                          | <b>&lt;50</b>                                             | <b>&lt;10</b>              | <b>&lt;5</b>                        | <b>&lt;1</b>                        |                                 |
| <b>Students</b> | Elementary school – equal susceptibility | 70% within-school coverage                                | Masks                      | Masks                               | Masks + cohorts                     | Masks                           |
|                 | Elementary school – half susceptibility  | 70% within-school coverage                                | 70% within-school coverage | Masks or 85% within-school coverage | Masks                               | Masks                           |
|                 | Middle school                            | 70% within-school coverage                                | 70% within-school coverage | Masks or 95% within-school coverage | Masks                               | Masks                           |
|                 | High school                              | 70% within-school coverage                                | 70% within-school coverage | 70% within-school coverage          | Masks or 75% within-school coverage | 70% within-school coverage      |
| <b>Teachers</b> | Elementary school – equal susceptibility | 70% within-school coverage                                | 70% within-school coverage | Masks or 90% within-school coverage | Masks                               |                                 |
|                 | Elementary school – half susceptibility  | 70% within-school coverage                                | 70% within-school coverage | 70% within-school coverage          | Masks or 85% within-school coverage |                                 |
|                 | Middle school                            | 70% within-school coverage                                | 70% within-school coverage | Masks or 90% VC                     | Masks                               |                                 |
|                 | High school                              | 70% within-school coverage                                | 70% within-school coverage | 70% within-school coverage          | Masks or 85% within-school coverage |                                 |

\*not observed under the specific combination of interventions simulated

\*\*Assuming a 380-person elementary school, 420-person middle school, and 680-person high school



## References

1. Centers for Disease Control and Prevention. Delta variant: What we know about the science Atlanta, GA: CDC; 2021 [Available from: <https://www.cdc.gov/coronavirus/2019-ncov/variants/delta-variant.html>].
2. California Department of Public Health. Tracking variants Sacramento, CA: CDPH; 2021 [Available from: <https://www.cdph.ca.gov/Programs/CID/DCDC/Pages/COVID-19/COVID-Variants.aspx>].
3. Guan W-j, Ni Z-y, Hu Y, Liang W-h, Ou C-q, He J-x, et al. Clinical Characteristics of Coronavirus Disease 2019 in China. *New England Journal of Medicine*. 2020;382(18):1708-20.
4. Li Q, Guan X, Wu P, Wang X, Zhou L, Tong Y, et al. Early Transmission Dynamics in Wuhan, China, of Novel Coronavirus-Infected Pneumonia. *New England Journal of Medicine*. 2020;382(13):1199-207.
5. Lauer SA, Grantz KH, Bi Q, Jones FK, Zheng Q, Meredith HR, et al. The Incubation Period of Coronavirus Disease 2019 (COVID-19) From Publicly Reported Confirmed Cases: Estimation and Application. *Annals of Internal Medicine*. 2020;172(9):577-82.
6. Ma S, Zhang J, Zeng M, Yun Q, Guo W, Zheng Y, et al. Epidemiological parameters of coronavirus disease 2019: a pooled analysis of publicly reported individual data of 1155 cases from seven countries. *medRxiv*. 2020:2020.03.21.20040329.
7. Byrne AW, McEvoy D, Collins AB, Hunt K, Casey M, Barber A, et al. Inferred duration of infectious period of SARS-CoV-2: rapid scoping review and analysis of available evidence for asymptomatic and symptomatic COVID-19 cases. *BMJ open*. 2020;10(8):e039856.
8. Li R, Pei S, Chen B, Song Y, Zhang T, Yang W, et al. Substantial undocumented infection facilitates the rapid dissemination of novel coronavirus (SARS-CoV2). *Science*. 2020:eabb3221.
9. Moghadas SM, Fitzpatrick MC, Sah P, Pandey A, Shoukat A, Singer BH, et al. The implications of silent transmission for the control of COVID-19 outbreaks. *Proceedings of the National Academy of Sciences*. 2020;117(30):17513-5.
10. Arentz M, Yim E, Klaff L, Lokhandwala S, Riedo FX, Chong M, et al. Characteristics and Outcomes of 21 Critically Ill Patients With COVID-19 in Washington State. *Jama*. 2020;323(16):1612-4.
11. Shoukat A, Wells CR, Langley JM, Singer BH, Galvani AP, Moghadas SM. Projecting demand for critical care beds during COVID-19 outbreaks in Canada. *Canadian Medical Association Journal*. 2020;192(19):E489-E96.
12. Lewnard JA, Liu VX, Jackson ML, Schmidt MA, Jewell BL, Flores JP, et al. Incidence, clinical outcomes, and transmission dynamics of severe coronavirus disease 2019 in California and Washington: prospective cohort study. *BMJ*. 2020;369:m1923.
13. Ferguson J, Rosser JI, Quintero O, Scott J, Subramanian A, Gumma M, et al. Characteristics and outcomes of coronavirus disease patients under nonsurge conditions, Northern California, USA, March–April 2020. *Emerging infectious diseases*. 2020;26(8):1679.
14. Davies NG, Klepac P, Liu Y, Prem K, Jit M, M R, et al. Age-dependent Effects in the Transmission and Control of COVID-19 Epidemics. *Nature medicine*. 2020.
15. Buitrago-Garcia D, Egli-Gany D, Counotte MJ, Hossmann S, Imeri H, Ipekci AM, et al. Occurrence and transmission potential of asymptomatic and presymptomatic SARS-CoV-2 infections: A living systematic review and meta-analysis. *PLOS Medicine*. 2020;17(9):e1003346.
16. Byambasuren O, Cardona M, Bell K, Clark J, McLaws M-L, Glasziou P. Estimating the extent of asymptomatic COVID-19 and its potential for community transmission: systematic review and meta-analysis. *Official Journal of the Association of Medical Microbiology and Infectious Disease Canada*. 2020;5(4):223-34.
17. Verity R, Okell LC, Dorigatti I, Winskill P, Whittaker C, Imai N, et al. Estimates of the severity of coronavirus disease 2019: a model-based analysis. *The Lancet infectious diseases*. 2020.

18. Viner RM, Mytton OT, Bonell C, Melendez-Torres GJ, Ward J, Hudson L, et al. Susceptibility to SARS-CoV-2 Infection Among Children and Adolescents Compared With Adults: A Systematic Review and Meta-analysis. *JAMA Pediatrics*. 2020.
19. Centers for Disease Control and Prevention. COVID Data Tracker: Vaccinations by County Atlanta, GA: CDC; 2021 [Available from: <https://covid.cdc.gov/covid-data-tracker/#vaccinations-county-view>].
20. Higdon MM, Wahl B, Jones CB, Rosen JG, Truelove SA, Baidya A, et al. A systematic review of COVID-19 vaccine efficacy and effectiveness against SARS-CoV-2 infection and disease. *medRxiv*. 2021:2021.09.17.21263549.
21. Lopez Bernal J, Andrews N, Gower C, Gallagher E, Simmons R, Thelwall S, et al. Effectiveness of Covid-19 Vaccines against the B.1.617.2 (Delta) Variant. *New England Journal of Medicine*. 2021.
22. Self WH. Comparative effectiveness of Moderna, Pfizer-BioNTech, and Janssen (Johnson & Johnson) vaccines in preventing COVID-19 hospitalizations among adults without immunocompromising conditions—United States, March–August 2021. *MMWR Morbidity and mortality weekly report*. 2021;70.
23. Cauchemez S, Bhattarai A, Marchbanks TL, Fagan RP, Ostroff S, Ferguson NM, et al. Role of social networks in shaping disease transmission during a community outbreak of 2009 H1N1 pandemic influenza. *Proceedings of the National Academy of Sciences*. 2011;108(7):2825-30.
24. Perkins TA, Paz-Soldan VA, Stoddard ST, Morrison AC, Forshey BM, Long KC, et al. Calling in sick: impacts of fever on intra-urban human mobility. *Proceedings Biological sciences*. 2016;283(1834).
25. Ferguson NM, Laydon D, Nedjati-Gilani G, Imai N, Ainslie K, Baguelin M, et al. Impact of non-pharmaceutical interventions (NPIs) to reduce COVID19 mortality and healthcare demand Imperial College London: Imperial College COVID-19 Response Team; 2020 [Available from: <https://www.imperial.ac.uk/media/imperial-college/medicine/sph/ide/gida-fellowships/Imperial-College-COVID19-NPI-modelling-16-03-2020.pdf>].
26. He X, Lau EH, Wu P, Deng X, Wang J, Hao X, et al. Temporal dynamics in viral shedding and transmissibility of COVID-19. *Nature medicine*. 2020;26(5):672-5.
27. Diekmann O, Heesterbeek JA, Roberts MG. The construction of next-generation matrices for compartmental epidemic models. *J R Soc Interface*. 2010;7(47):873-85.
28. Wallinga J, Teunis P, Kretzschmar M. Using data on social contacts to estimate age-specific transmission parameters for respiratory-spread infectious agents. *American journal of epidemiology*. 2006;164(10):936-44.
29. Huang C, Wang Y, Li X, Ren L, Zhao J, Hu Y, et al. Clinical features of patients infected with 2019 novel coronavirus in Wuhan, China. *The lancet*. 2020;395(10223):497-506.
30. Wang D, Hu B, Hu C, Zhu F, Liu X, Zhang J, et al. Clinical Characteristics of 138 Hospitalized Patients With 2019 Novel Coronavirus–Infected Pneumonia in Wuhan, China. *Jama*. 2020;323(11):1061-9.
